# Supplementary material for: Global catalog of soil moisture droughts over the past four decades
Source: Copernicus journal article supplement (doi:10.5194/hess-29-3341-2025), 2025-07-30
Supplement: Supplementary file 1 [file hess-29-3341-2025-supplement.zip]

**Table S2. Global land drought events (GLDEs) according to mHM.**

This is a result of an algorithmic, density-based clustering of drought grids based on their spatiotemporal position. The algorithm does not evaluate whether nearby GLDEs occurring at the same time were caused by one large-scale climatic event or not.

| spatiotemporal order | continent  | start      | end        | n. o. decades | max. area of GLDE (km <sup>2</sup> ) | spatiotemporal category | dynamic order | dynamic category |
|----------------------|------------|------------|------------|---------------|--------------------------------------|-------------------------|---------------|------------------|
| 1                    | Eurasia    | 2013-06-26 | 2022-12-25 | 347           | 9539417                              | 7                       | 3             | 7                |
| 2                    | Africa     | 2013-04-07 | 2022-12-25 | 355           | 7292765                              | 7                       | 7             | 7                |
| 3                    | Eurasia    | 2007-04-19 | 2014-07-10 | 264           | 4761255                              | 7                       | 1             | 7                |
| 4                    | S. America | 2018-12-17 | 2022-12-25 | 147           | 7629587                              | 7                       | 5             | 7                |
| 5                    | N. America | 2019-10-03 | 2022-12-25 | 118           | 3013867                              | 7                       | 25            | 7                |
| 6                    | N. America | 1987-10-11 | 1991-06-21 | 135           | 3307610                              | 7                       | 49            | 6                |
| 7                    | Australia  | 2017-12-12 | 2022-01-19 | 150           | 2294401                              | 7                       | 16            | 7                |
| 8                    | N. America | 1980-01-01 | 1982-05-19 | 87            | 2087318                              | 7                       | 48            | 6                |
| 9                    | S. America | 2014-01-01 | 2016-04-20 | 85            | 5855939                              | 7                       | 6             | 7                |
| 10                   | Eurasia    | 2014-07-11 | 2016-02-20 | 59            | 3297703                              | 7                       | 10            | 7                |
| 11                   | Eurasia    | 1985-03-15 | 1988-07-16 | 122           | 2306091                              | 7                       | 9             | 7                |
| 12                   | N. America | 2012-02-02 | 2013-09-23 | 60            | 3127869                              | 7                       | 14            | 7                |
| 13                   | Eurasia    | 2018-05-01 | 2019-08-13 | 47            | 3300973                              | 7                       | 8             | 7                |
| 14                   | Eurasia    | 2017-05-26 | 2019-02-14 | 63            | 2895326                              | 7                       | 21            | 7                |
| 15                   | S. America | 2010-11-19 | 2014-04-01 | 123           | 1913986                              | 7                       | 23            | 7                |
| 16                   | Africa     | 1994-02-16 | 1996-12-21 | 104           | 2221087                              | 7                       | 19            | 7                |
| 17                   | N. America | 1980-01-01 | 1982-11-25 | 106           | 1619201                              | 7                       | 17            | 7                |
| 18                   | S. America | 2008-04-13 | 2009-12-23 | 62            | 2074687                              | 7                       | 94            | 6                |
| 19                   | Africa     | 2020-04-20 | 2022-12-25 | 98            | 1357221                              | 7                       | 11            | 7                |
| 20                   | Eurasia    | 2007-06-08 | 2009-06-16 | 74            | 1181715                              | 7                       | 109           | 6                |
| 21                   | N. America | 2000-11-11 | 2003-04-29 | 90            | 1100619                              | 7                       | 119           | 6                |
| 22                   | S. America | 2016-02-21 | 2018-02-09 | 72            | 2715482                              | 7                       | 4             | 7                |
| 23                   | Eurasia    | 1982-07-19 | 1984-07-27 | 74            | 653364                               | 7                       | 307           | 4                |
| 24                   | Africa     | 2018-07-30 | 2021-01-04 | 89            | 1380991                              | 7                       | 52            | 6                |
| 25                   | Eurasia    | 1984-06-28 | 1985-08-31 | 43            | 1165016                              | 7                       | 112           | 6                |
| 26                   | Eurasia    | 2002-05-05 | 2003-04-19 | 35            | 1904143                              | 7                       | 66            | 6                |
| 27                   | N. America | 2013-11-03 | 2015-12-12 | 77            | 1157522                              | 7                       | 51            | 6                |
| 28                   | Eurasia    | 1991-07-02 | 1992-07-15 | 38            | 1498488                              | 7                       | 40            | 6                |
| 29                   | N. America | 2010-09-10 | 2012-05-11 | 61            | 1448690                              | 7                       | 36            | 6                |
| 30                   | Africa     | 1991-11-29 | 1993-01-01 | 40            | 2057363                              | 7                       | 75            | 6                |
| 31                   | N. America | 2003-07-09 | 2004-09-20 | 44            | 1612019                              | 7                       | 50            | 6                |
| 32                   | N. America | 2015-03-28 | 2016-06-09 | 44            | 1465316                              | 7                       | 12            | 7                |
| 33                   | Eurasia    | 1986-06-08 | 1987-06-02 | 36            | 1354993                              | 6                       | 137           | 5                |
| 34                   | N. America | 1994-07-06 | 1995-07-30 | 39            | 966152                               | 6                       | 31            | 7                |
| 35                   | N. America | 2005-10-06 | 2006-12-29 | 45            | 1373320                              | 6                       | 37            | 6                |
| 36                   | Eurasia    | 1986-03-30 | 1987-04-13 | 38            | 1079984                              | 6                       | 42            | 6                |
| 37                   | Eurasia    | 2011-09-05 | 2013-02-05 | 52            | 951018                               | 6                       | 29            | 7                |

|    |            |            |            |     |         |   |     |   |
|----|------------|------------|------------|-----|---------|---|-----|---|
| 38 | N. America | 1989-07-22 | 1990-06-26 | 34  | 783767  | 6 | 198 | 5 |
| 39 | N. America | 2007-03-20 | 2008-03-03 | 35  | 1440755 | 6 | 63  | 6 |
| 40 | Eurasia    | 2011-05-28 | 2012-04-11 | 32  | 1091444 | 6 | 80  | 6 |
| 41 | S. America | 2010-04-13 | 2011-02-06 | 30  | 3574812 | 6 | 15  | 7 |
| 42 | Eurasia    | 1980-06-19 | 1981-05-04 | 32  | 825153  | 6 | 146 | 5 |
| 43 | N. America | 2013-06-26 | 2014-05-21 | 33  | 1084922 | 6 | 158 | 5 |
| 44 | Eurasia    | 2003-06-29 | 2004-05-13 | 32  | 1218688 | 6 | 149 | 5 |
| 45 | N. America | 2013-10-04 | 2015-05-06 | 58  | 1118176 | 6 | 56  | 6 |
| 46 | Africa     | 2005-09-16 | 2006-11-19 | 43  | 1424212 | 6 | 95  | 6 |
| 47 | Eurasia    | 2009-06-17 | 2010-05-02 | 32  | 1590563 | 6 | 38  | 6 |
| 48 | N. America | 1999-05-31 | 2000-06-13 | 38  | 1133603 | 6 | 39  | 6 |
| 49 | Africa     | 2016-07-30 | 2017-07-04 | 34  | 1855209 | 6 | 68  | 6 |
| 50 | Eurasia    | 1989-06-12 | 1990-06-06 | 36  | 1060266 | 6 | 22  | 7 |
| 51 | N. America | 2009-07-27 | 2011-06-26 | 70  | 385061  | 6 | 218 | 5 |
| 52 | N. America | 2017-10-13 | 2018-10-17 | 37  | 895200  | 6 | 96  | 6 |
| 53 | Eurasia    | 1997-07-30 | 1998-04-25 | 27  | 1608680 | 6 | 81  | 6 |
| 54 | Australia  | 1991-08-21 | 1993-01-31 | 53  | 1276708 | 6 | 24  | 7 |
| 55 | Eurasia    | 1998-07-15 | 1999-05-20 | 31  | 945502  | 6 | 201 | 5 |
| 56 | Eurasia    | 1992-08-05 | 1994-05-26 | 66  | 480678  | 6 | 184 | 5 |
| 57 | Australia  | 2005-10-26 | 2007-11-24 | 76  | 670897  | 6 | 100 | 6 |
| 58 | Australia  | 1989-12-19 | 1991-01-22 | 40  | 913643  | 6 | 115 | 6 |
| 59 | Eurasia    | 2002-08-03 | 2003-10-26 | 45  | 1034955 | 6 | 77  | 6 |
| 60 | Eurasia    | 2011-07-07 | 2012-09-08 | 43  | 630385  | 6 | 70  | 6 |
| 61 | Africa     | 2009-05-18 | 2010-07-21 | 43  | 1590825 | 6 | 13  | 7 |
| 62 | Africa     | 2006-10-31 | 2007-08-26 | 30  | 1615143 | 6 | 28  | 7 |
| 63 | Australia  | 2018-12-17 | 2020-02-29 | 44  | 887582  | 6 | 245 | 4 |
| 64 | Eurasia    | 1988-06-27 | 1989-05-12 | 32  | 725084  | 6 | 105 | 6 |
| 65 | Eurasia    | 1999-06-20 | 2000-04-04 | 29  | 935405  | 6 | 106 | 6 |
| 66 | S. America | 1997-08-29 | 1998-05-15 | 26  | 2343570 | 6 | 45  | 6 |
| 67 | S. America | 2007-03-30 | 2008-01-23 | 30  | 2251922 | 6 | 30  | 7 |
| 68 | Eurasia    | 1993-07-11 | 1996-07-04 | 109 | 569164  | 6 | 172 | 5 |
| 69 | N. America | 2004-06-23 | 2005-05-18 | 33  | 561814  | 6 | 210 | 5 |
| 70 | Eurasia    | 2000-10-22 | 2002-06-23 | 61  | 755228  | 6 | 53  | 6 |
| 71 | N. America | 2003-06-29 | 2004-06-02 | 34  | 696447  | 6 | 87  | 6 |
| 72 | N. America | 2014-06-11 | 2015-05-06 | 33  | 747118  | 6 | 88  | 6 |
| 73 | S. America | 1992-04-27 | 1993-05-21 | 39  | 989760  | 6 | 26  | 7 |
| 74 | Eurasia    | 2003-05-10 | 2004-02-03 | 27  | 1149476 | 6 | 102 | 6 |
| 75 | N. America | 1992-07-26 | 1993-06-20 | 33  | 593992  | 6 | 310 | 4 |
| 76 | Australia  | 1990-03-19 | 1991-06-11 | 45  | 749900  | 6 | 133 | 5 |
| 77 | Australia  | 2006-05-24 | 2007-05-18 | 36  | 799906  | 6 | 135 | 5 |
| 78 | Africa     | 1983-07-04 | 1984-05-28 | 33  | 1050331 | 6 | 82  | 6 |
| 79 | Africa     | 1984-07-08 | 1985-07-12 | 37  | 853484  | 6 | 238 | 4 |
| 80 | Eurasia    | 2019-10-03 | 2020-08-07 | 31  | 1042239 | 6 | 83  | 6 |
| 81 | Eurasia    | 2016-07-20 | 2017-04-15 | 27  | 807600  | 6 | 258 | 4 |
| 82 | Africa     | 1986-12-15 | 1987-12-19 | 37  | 874830  | 6 | 65  | 6 |

|     |            |            |            |    |         |   |     |   |
|-----|------------|------------|------------|----|---------|---|-----|---|
| 83  | N. America | 1995-06-01 | 1996-05-15 | 35 | 408163  | 6 | 247 | 4 |
| 84  | Eurasia    | 2009-08-26 | 2010-07-21 | 33 | 892268  | 6 | 41  | 6 |
| 85  | Africa     | 1980-04-20 | 1981-12-20 | 61 | 659978  | 6 | 207 | 5 |
| 86  | Africa     | 2009-03-09 | 2009-12-23 | 29 | 1126713 | 6 | 20  | 7 |
| 87  | Eurasia    | 2003-07-19 | 2004-06-02 | 32 | 634283  | 6 | 227 | 4 |
| 88  | N. America | 2022-06-09 | 2022-12-25 | 20 | 810819  | 6 | 54  | 6 |
| 89  | Eurasia    | 2010-07-22 | 2011-05-07 | 29 | 749454  | 6 | 272 | 4 |
| 90  | N. America | 1981-07-14 | 1982-04-29 | 29 | 580324  | 6 | 216 | 5 |
| 91  | Eurasia    | 2022-07-19 | 2022-12-25 | 16 | 1501277 | 6 | 145 | 5 |
| 92  | Eurasia    | 1982-04-30 | 1983-04-24 | 36 | 583992  | 6 | 64  | 6 |
| 93  | Eurasia    | 2018-05-21 | 2019-02-04 | 26 | 500385  | 6 | 293 | 4 |
| 94  | Eurasia    | 2013-10-04 | 2014-06-20 | 26 | 1339299 | 6 | 47  | 6 |
| 95  | N. America | 1999-05-01 | 2000-06-13 | 41 | 273260  | 6 | 285 | 4 |
| 96  | S. America | 1983-01-25 | 1984-01-09 | 35 | 906637  | 6 | 18  | 7 |
| 97  | N. America | 2017-08-14 | 2018-06-19 | 31 | 545293  | 6 | 314 | 4 |
| 98  | Eurasia    | 1980-01-01 | 1980-06-18 | 17 | 496679  | 6 | 495 | 3 |
| 99  | Eurasia    | 1998-10-23 | 1999-11-06 | 38 | 602778  | 6 | 141 | 5 |
| 100 | Australia  | 2008-12-29 | 2009-12-23 | 36 | 551517  | 6 | 92  | 6 |
| 101 | S. America | 2013-01-27 | 2013-12-02 | 31 | 1124255 | 6 | 120 | 6 |
| 102 | Eurasia    | 2016-05-01 | 2017-02-04 | 28 | 915146  | 6 | 155 | 5 |
| 103 | N. America | 2001-08-08 | 2002-04-04 | 24 | 931559  | 6 | 57  | 6 |
| 104 | Eurasia    | 1984-08-07 | 1985-07-02 | 33 | 791684  | 6 | 331 | 4 |
| 105 | S. America | 2016-03-02 | 2016-10-07 | 22 | 1449651 | 6 | 79  | 6 |
| 106 | Eurasia    | 1994-07-06 | 1995-03-12 | 25 | 618356  | 6 | 129 | 5 |
| 107 | Africa     | 2012-03-13 | 2012-09-08 | 18 | 1269794 | 6 | 213 | 5 |
| 108 | N. America | 2006-08-22 | 2007-04-18 | 24 | 572226  | 6 | 283 | 4 |
| 109 | Eurasia    | 1985-06-23 | 1986-05-18 | 33 | 396364  | 6 | 311 | 4 |
| 110 | Eurasia    | 1994-08-15 | 1995-05-31 | 29 | 340280  | 6 | 362 | 4 |
| 111 | Eurasia    | 1994-12-13 | 1995-12-07 | 36 | 419715  | 6 | 380 | 4 |
| 112 | Eurasia    | 2007-07-18 | 2008-06-01 | 32 | 502293  | 6 | 225 | 4 |
| 113 | N. America | 2007-08-27 | 2008-05-22 | 27 | 535934  | 6 | 90  | 6 |
| 114 | Eurasia    | 2006-07-03 | 2006-11-29 | 15 | 593453  | 6 | 170 | 5 |
| 115 | Eurasia    | 1988-07-07 | 1989-04-22 | 29 | 431554  | 6 | 280 | 4 |
| 116 | S. America | 2006-02-13 | 2006-09-30 | 23 | 1029045 | 6 | 60  | 6 |
| 117 | Eurasia    | 2007-11-05 | 2008-09-29 | 33 | 849384  | 6 | 74  | 6 |
| 118 | Eurasia    | 2005-09-26 | 2006-04-13 | 20 | 740740  | 6 | 163 | 5 |
| 119 | N. America | 2006-08-12 | 2007-06-27 | 32 | 404613  | 6 | 241 | 4 |
| 120 | Eurasia    | 2003-08-28 | 2004-04-13 | 23 | 884177  | 6 | 73  | 6 |
| 121 | Eurasia    | 2004-02-24 | 2004-12-29 | 31 | 583457  | 6 | 167 | 5 |
| 122 | Eurasia    | 2004-10-11 | 2005-06-27 | 26 | 1026165 | 6 | 205 | 5 |
| 123 | N. America | 2006-07-03 | 2007-03-29 | 27 | 496480  | 6 | 234 | 4 |
| 124 | Eurasia    | 1984-03-30 | 1984-11-14 | 23 | 658459  | 6 | 121 | 6 |
| 125 | N. America | 2007-07-18 | 2008-06-21 | 34 | 274771  | 6 | 154 | 5 |
| 126 | S. America | 1980-06-19 | 1981-04-14 | 30 | 407690  | 6 | 265 | 4 |
| 127 | Eurasia    | 1987-09-01 | 1988-05-27 | 27 | 538385  | 5 | 254 | 4 |

|     |            |            |            |    |         |   |     |   |
|-----|------------|------------|------------|----|---------|---|-----|---|
| 128 | N. America | 2017-07-25 | 2018-04-30 | 28 | 378227  | 5 | 312 | 4 |
| 129 | S. America | 2005-01-19 | 2005-07-17 | 18 | 1303597 | 5 | 44  | 6 |
| 130 | N. America | 1997-06-20 | 1998-03-16 | 27 | 524634  | 5 | 343 | 4 |
| 131 | N. America | 2000-04-25 | 2000-11-20 | 21 | 744622  | 5 | 91  | 6 |
| 132 | Eurasia    | 2017-10-03 | 2018-02-19 | 14 | 1403638 | 5 | 55  | 6 |
| 133 | Eurasia    | 2001-07-09 | 2002-04-14 | 28 | 601996  | 5 | 150 | 5 |
| 134 | Africa     | 2011-05-08 | 2011-10-14 | 16 | 1207221 | 5 | 61  | 6 |
| 135 | N. America | 2005-06-18 | 2006-05-13 | 33 | 271337  | 5 | 435 | 3 |
| 136 | N. America | 2010-07-22 | 2011-07-26 | 37 | 307902  | 5 | 114 | 6 |
| 137 | Eurasia    | 1990-07-17 | 1991-03-23 | 25 | 526700  | 5 | 173 | 5 |
| 138 | N. America | 2012-08-10 | 2013-05-06 | 27 | 373910  | 5 | 300 | 4 |
| 139 | Eurasia    | 2002-07-24 | 2003-05-09 | 29 | 423883  | 5 | 244 | 4 |
| 140 | Australia  | 2017-01-26 | 2018-03-01 | 40 | 518830  | 5 | 290 | 4 |
| 141 | Eurasia    | 2016-05-31 | 2016-10-07 | 13 | 629592  | 5 | 86  | 6 |
| 142 | Eurasia    | 1982-06-19 | 1983-04-04 | 29 | 569716  | 5 | 192 | 5 |
| 143 | Eurasia    | 1980-01-01 | 1980-04-19 | 11 | 1358290 | 5 | 128 | 5 |
| 144 | Eurasia    | 1980-01-01 | 1980-06-08 | 16 | 660726  | 5 | 402 | 4 |
| 145 | Eurasia    | 1995-11-18 | 1996-04-15 | 15 | 740315  | 5 | 62  | 6 |
| 146 | N. America | 1996-07-05 | 1997-06-19 | 35 | 432383  | 5 | 315 | 4 |
| 147 | Australia  | 1996-01-07 | 1997-01-20 | 38 | 480458  | 5 | 195 | 5 |
| 148 | Africa     | 2017-03-17 | 2017-11-11 | 24 | 776511  | 5 | 125 | 6 |
| 149 | S. America | 2020-02-20 | 2020-07-08 | 14 | 915259  | 5 | 193 | 5 |
| 150 | Eurasia    | 2001-06-29 | 2002-04-14 | 29 | 471466  | 5 | 340 | 4 |
| 151 | Africa     | 2011-02-07 | 2011-09-04 | 21 | 918992  | 5 | 171 | 5 |
| 152 | Eurasia    | 1998-10-23 | 1999-04-20 | 18 | 618475  | 5 | 162 | 5 |
| 153 | Eurasia    | 1997-07-10 | 1998-04-25 | 29 | 318825  | 5 | 336 | 4 |
| 154 | Eurasia    | 2022-05-10 | 2022-09-16 | 13 | 744836  | 5 | 148 | 5 |
| 155 | Eurasia    | 2000-10-12 | 2001-04-09 | 18 | 511960  | 5 | 322 | 4 |
| 156 | N. America | 2022-09-07 | 2022-12-25 | 11 | 749499  | 5 | 252 | 4 |
| 157 | Eurasia    | 2013-11-23 | 2014-06-10 | 20 | 575131  | 5 | 274 | 4 |
| 158 | Africa     | 2015-10-14 | 2016-05-10 | 21 | 811520  | 5 | 157 | 5 |
| 159 | Africa     | 2021-03-26 | 2021-10-21 | 21 | 488720  | 5 | 159 | 5 |
| 160 | N. America | 1990-10-15 | 1991-03-23 | 16 | 641125  | 5 | 97  | 6 |
| 161 | S. America | 1985-11-10 | 1986-02-27 | 11 | 1226945 | 5 | 71  | 6 |
| 162 | Australia  | 2008-04-13 | 2008-12-08 | 24 | 593536  | 5 | 188 | 5 |
| 163 | N. America | 1980-08-08 | 1981-04-24 | 26 | 455895  | 5 | 175 | 5 |
| 164 | Eurasia    | 1994-08-15 | 1995-07-10 | 33 | 270517  | 5 | 428 | 3 |
| 165 | N. America | 1987-10-01 | 1988-03-28 | 18 | 439618  | 5 | 282 | 4 |
| 166 | Africa     | 2005-02-08 | 2005-12-04 | 30 | 766190  | 5 | 46  | 6 |
| 167 | Eurasia    | 1999-11-17 | 2000-12-20 | 40 | 381654  | 5 | 33  | 6 |
| 168 | Eurasia    | 1992-06-06 | 1992-12-12 | 19 | 880346  | 5 | 98  | 6 |
| 169 | Africa     | 1993-07-01 | 1994-04-16 | 29 | 503701  | 5 | 176 | 5 |
| 170 | Eurasia    | 1982-09-17 | 1984-04-28 | 59 | 146139  | 5 | 492 | 3 |
| 171 | Africa     | 2022-01-30 | 2022-08-17 | 20 | 587454  | 5 | 259 | 4 |
| 172 | Eurasia    | 2014-08-10 | 2015-04-06 | 24 | 379988  | 5 | 505 | 2 |

|     |            |            |            |    |         |   |     |   |
|-----|------------|------------|------------|----|---------|---|-----|---|
| 173 | Eurasia    | 1992-08-05 | 1993-05-31 | 30 | 294602  | 5 | 477 | 3 |
| 174 | Eurasia    | 2005-07-28 | 2006-04-23 | 27 | 342045  | 5 | 251 | 4 |
| 175 | Eurasia    | 1981-08-23 | 1982-06-18 | 30 | 241086  | 5 | 438 | 3 |
| 176 | Africa     | 1992-04-17 | 1992-12-02 | 23 | 530840  | 5 | 242 | 4 |
| 177 | N. America | 2009-08-26 | 2010-05-22 | 27 | 277968  | 5 | 262 | 4 |
| 178 | Eurasia    | 2022-01-30 | 2022-05-19 | 11 | 1068726 | 5 | 89  | 6 |
| 179 | S. America | 1991-11-29 | 1992-03-17 | 11 | 1232187 | 5 | 101 | 6 |
| 180 | Eurasia    | 2010-12-29 | 2011-06-16 | 17 | 645503  | 5 | 240 | 4 |
| 181 | N. America | 1999-10-18 | 2000-04-04 | 17 | 611571  | 5 | 143 | 5 |
| 182 | Australia  | 2022-03-01 | 2022-11-15 | 26 | 416313  | 5 | 306 | 4 |
| 183 | Eurasia    | 2007-03-10 | 2007-11-04 | 24 | 478612  | 5 | 126 | 6 |
| 184 | Africa     | 2005-04-09 | 2005-10-15 | 19 | 654861  | 5 | 202 | 5 |
| 185 | N. America | 1997-07-30 | 1998-06-04 | 31 | 253974  | 5 | 515 | 2 |
| 186 | Eurasia    | 2020-09-07 | 2021-03-25 | 20 | 391490  | 5 | 178 | 5 |
| 187 | Eurasia    | 2014-08-30 | 2015-04-26 | 24 | 460023  | 5 | 409 | 3 |
| 188 | Eurasia    | 1982-08-28 | 1983-05-24 | 27 | 340017  | 5 | 211 | 5 |
| 189 | S. America | 2012-02-22 | 2012-11-07 | 26 | 706196  | 5 | 140 | 5 |
| 190 | N. America | 2010-06-12 | 2011-04-17 | 31 | 200748  | 5 | 557 | 2 |
| 191 | Eurasia    | 2005-09-26 | 2006-03-24 | 18 | 349660  | 5 | 297 | 4 |
| 192 | N. America | 1981-01-25 | 1981-07-23 | 18 | 536547  | 5 | 194 | 5 |
| 193 | Eurasia    | 1992-08-25 | 1993-06-10 | 29 | 409225  | 5 | 214 | 5 |
| 194 | Eurasia    | 2000-11-21 | 2001-05-09 | 17 | 519983  | 5 | 230 | 4 |
| 195 | Eurasia    | 2021-03-16 | 2021-07-03 | 11 | 772599  | 5 | 231 | 4 |
| 196 | Eurasia    | 2013-09-14 | 2014-04-21 | 22 | 529223  | 5 | 261 | 4 |
| 197 | S. America | 2018-01-21 | 2018-05-10 | 11 | 918227  | 5 | 110 | 6 |
| 198 | Eurasia    | 2002-08-03 | 2003-05-19 | 29 | 249227  | 5 | 344 | 4 |
| 199 | Eurasia    | 2017-09-23 | 2018-02-09 | 14 | 513591  | 5 | 295 | 4 |
| 200 | Eurasia    | 1983-09-02 | 1984-02-08 | 16 | 481314  | 5 | 323 | 4 |
| 201 | N. America | 2017-07-05 | 2017-11-21 | 14 | 487178  | 5 | 333 | 4 |
| 202 | N. America | 1984-05-09 | 1984-10-15 | 16 | 524471  | 5 | 179 | 5 |
| 203 | Eurasia    | 2013-06-26 | 2013-12-22 | 18 | 284176  | 5 | 273 | 4 |
| 204 | Australia  | 1983-01-05 | 1983-09-01 | 24 | 374013  | 5 | 156 | 5 |
| 205 | Eurasia    | 2007-09-06 | 2008-03-13 | 19 | 560476  | 5 | 332 | 4 |
| 206 | Africa     | 2015-11-13 | 2016-04-30 | 17 | 898204  | 5 | 144 | 5 |
| 207 | Eurasia    | 1981-10-12 | 1982-04-19 | 19 | 452881  | 5 | 447 | 3 |
| 208 | S. America | 1988-03-09 | 1988-06-16 | 10 | 873833  | 5 | 117 | 6 |
| 209 | Eurasia    | 2022-06-19 | 2022-09-26 | 10 | 494568  | 5 | 190 | 5 |
| 210 | Eurasia    | 2022-08-08 | 2022-12-25 | 14 | 435016  | 5 | 457 | 3 |
| 211 | Eurasia    | 2003-08-08 | 2004-06-02 | 30 | 254215  | 5 | 567 | 2 |
| 212 | Eurasia    | 1993-07-31 | 1994-06-05 | 31 | 212547  | 5 | 458 | 3 |
| 213 | N. America | 1998-06-25 | 1999-05-10 | 32 | 171198  | 5 | 288 | 4 |
| 214 | Africa     | 2006-12-30 | 2007-04-28 | 12 | 875731  | 5 | 85  | 6 |
| 215 | Eurasia    | 2016-03-22 | 2016-06-29 | 10 | 1479314 | 5 | 138 | 5 |
| 216 | N. America | 2017-08-14 | 2018-04-30 | 26 | 462664  | 5 | 372 | 4 |
| 217 | N. America | 2016-09-08 | 2017-01-05 | 12 | 673690  | 5 | 316 | 4 |

|     |            |            |            |    |         |   |     |   |
|-----|------------|------------|------------|----|---------|---|-----|---|
| 218 | Eurasia    | 2021-10-22 | 2022-01-09 | 8  | 1015498 | 5 | 67  | 6 |
| 219 | Eurasia    | 2020-07-29 | 2021-06-03 | 31 | 236784  | 5 | 419 | 3 |
| 220 | Eurasia    | 2001-06-09 | 2001-11-25 | 17 | 508684  | 5 | 161 | 5 |
| 221 | N. America | 2022-08-18 | 2022-12-25 | 13 | 284075  | 5 | 464 | 3 |
| 222 | S. America | 1996-04-16 | 1996-11-11 | 21 | 295161  | 4 | 440 | 3 |
| 223 | N. America | 1998-09-23 | 1999-01-20 | 12 | 560080  | 4 | 338 | 4 |
| 224 | Australia  | 2018-04-11 | 2019-01-25 | 29 | 359284  | 4 | 381 | 4 |
| 225 | Australia  | 2020-04-10 | 2020-08-07 | 12 | 621276  | 4 | 209 | 5 |
| 226 | Eurasia    | 1982-09-17 | 1983-01-24 | 13 | 507212  | 4 | 226 | 4 |
| 227 | Eurasia    | 1984-06-28 | 1984-11-04 | 13 | 508071  | 4 | 196 | 5 |
| 228 | Africa     | 2002-06-24 | 2002-10-11 | 11 | 740772  | 4 | 136 | 5 |
| 229 | Eurasia    | 1988-07-27 | 1989-05-22 | 30 | 216655  | 4 | 379 | 4 |
| 230 | Eurasia    | 2000-08-23 | 2001-04-09 | 23 | 437558  | 4 | 168 | 5 |
| 231 | N. America | 2019-06-25 | 2020-04-19 | 30 | 146683  | 4 | 550 | 2 |
| 232 | S. America | 1980-01-01 | 1980-05-09 | 13 | 399566  | 4 | 223 | 4 |
| 233 | N. America | 1991-08-01 | 1992-04-26 | 27 | 265624  | 4 | 139 | 5 |
| 234 | Eurasia    | 2019-04-16 | 2019-07-24 | 10 | 753694  | 4 | 177 | 5 |
| 235 | Eurasia    | 2011-08-26 | 2012-05-01 | 25 | 271125  | 4 | 432 | 3 |
| 236 | N. America | 1991-06-22 | 1991-12-08 | 17 | 388492  | 4 | 132 | 5 |
| 237 | S. America | 2003-04-30 | 2003-10-26 | 18 | 524994  | 4 | 76  | 6 |
| 238 | Australia  | 2017-05-06 | 2017-09-02 | 12 | 526913  | 4 | 191 | 5 |
| 239 | N. America | 1980-01-01 | 1980-04-29 | 12 | 347823  | 4 | 431 | 3 |
| 240 | N. America | 2022-09-07 | 2022-12-25 | 11 | 338771  | 4 | 352 | 4 |
| 241 | N. America | 2018-01-01 | 2018-08-18 | 23 | 402411  | 4 | 236 | 4 |
| 242 | N. America | 2008-08-31 | 2009-04-27 | 24 | 286290  | 4 | 524 | 2 |
| 243 | Eurasia    | 2015-06-16 | 2015-10-03 | 11 | 638092  | 4 | 152 | 5 |
| 244 | N. America | 1992-02-27 | 1992-07-25 | 15 | 600931  | 4 | 271 | 4 |
| 245 | S. America | 1998-01-16 | 1998-11-21 | 31 | 341523  | 4 | 204 | 5 |
| 246 | N. America | 2016-07-20 | 2016-12-26 | 16 | 447534  | 4 | 255 | 4 |
| 247 | Eurasia    | 1995-06-11 | 1996-05-15 | 34 | 179290  | 4 | 483 | 3 |
| 248 | Eurasia    | 2008-08-21 | 2009-05-17 | 27 | 215249  | 4 | 318 | 4 |
| 249 | Eurasia    | 2000-10-22 | 2001-04-29 | 19 | 709001  | 4 | 127 | 5 |
| 250 | Eurasia    | 2002-08-13 | 2003-05-29 | 29 | 180494  | 4 | 525 | 2 |
| 251 | Eurasia    | 2015-09-14 | 2016-05-30 | 26 | 396006  | 4 | 305 | 4 |
| 252 | Eurasia    | 2011-04-18 | 2011-07-06 | 8  | 823549  | 4 | 296 | 4 |
| 253 | S. America | 1989-05-23 | 1989-11-08 | 17 | 362678  | 4 | 426 | 3 |
| 254 | N. America | 2019-04-16 | 2019-08-13 | 12 | 344423  | 4 | 471 | 3 |
| 255 | Eurasia    | 2020-04-10 | 2020-08-07 | 12 | 450586  | 4 | 337 | 4 |
| 256 | Africa     | 2013-01-07 | 2013-04-16 | 10 | 994676  | 4 | 134 | 5 |
| 257 | N. America | 2013-06-26 | 2013-10-13 | 11 | 346128  | 4 | 390 | 4 |
| 258 | Eurasia    | 2020-10-27 | 2021-05-24 | 21 | 479206  | 4 | 404 | 4 |
| 259 | N. America | 1998-08-14 | 1999-04-10 | 24 | 207161  | 4 | 472 | 3 |
| 260 | Africa     | 2016-01-02 | 2016-06-09 | 16 | 411919  | 4 | 224 | 4 |
| 261 | Eurasia    | 1980-06-09 | 1980-10-06 | 12 | 292758  | 4 | 529 | 2 |
| 262 | Australia  | 2021-04-05 | 2021-07-13 | 10 | 464002  | 4 | 468 | 3 |

|     |            |            |            |    |        |   |     |   |
|-----|------------|------------|------------|----|--------|---|-----|---|
| 263 | Africa     | 2019-11-22 | 2020-04-09 | 14 | 683753 | 4 | 43  | 6 |
| 264 | Africa     | 2002-01-05 | 2002-06-23 | 17 | 404614 | 4 | 147 | 5 |
| 265 | Eurasia    | 1993-07-11 | 1994-04-16 | 28 | 156270 | 4 | 555 | 2 |
| 266 | Eurasia    | 2014-01-02 | 2014-04-01 | 9  | 723558 | 4 | 186 | 5 |
| 267 | N. America | 2014-06-21 | 2015-03-17 | 27 | 334297 | 4 | 2   | 7 |
| 268 | N. America | 2010-05-13 | 2010-08-20 | 10 | 570821 | 4 | 116 | 6 |
| 269 | Eurasia    | 2012-11-28 | 2013-04-26 | 15 | 555415 | 4 | 200 | 5 |
| 270 | Eurasia    | 2019-08-14 | 2020-05-29 | 29 | 209310 | 4 | 439 | 3 |
| 271 | Eurasia    | 1989-08-21 | 1989-12-18 | 12 | 356078 | 4 | 410 | 3 |
| 272 | Eurasia    | 2019-04-16 | 2019-09-22 | 16 | 309448 | 4 | 371 | 4 |
| 273 | Eurasia    | 1984-09-06 | 1985-03-24 | 20 | 239015 | 4 | 354 | 4 |
| 274 | Eurasia    | 2016-08-09 | 2017-04-05 | 24 | 253693 | 4 | 363 | 4 |
| 275 | Eurasia    | 2011-11-14 | 2012-02-21 | 10 | 618383 | 4 | 182 | 5 |
| 276 | Eurasia    | 1997-07-20 | 1998-04-25 | 28 | 167570 | 4 | 456 | 3 |
| 277 | S. America | 2009-10-05 | 2010-04-12 | 19 | 635491 | 4 | 34  | 6 |
| 278 | Eurasia    | 2022-08-18 | 2022-12-25 | 13 | 302156 | 4 | 454 | 3 |
| 279 | N. America | 2000-08-03 | 2001-05-19 | 29 | 243709 | 4 | 563 | 2 |
| 280 | Eurasia    | 1981-12-21 | 1982-06-08 | 17 | 265049 | 4 | 397 | 4 |
| 281 | S. America | 2009-10-25 | 2010-03-23 | 15 | 615143 | 4 | 103 | 6 |
| 282 | N. America | 2011-09-25 | 2012-04-01 | 19 | 175179 | 4 | 594 | 2 |
| 283 | Eurasia    | 1981-08-23 | 1982-04-29 | 25 | 230763 | 4 | 444 | 3 |
| 284 | Eurasia    | 2015-05-07 | 2015-08-04 | 9  | 705754 | 4 | 164 | 5 |
| 285 | Australia  | 1990-12-14 | 1991-04-22 | 13 | 490928 | 4 | 345 | 4 |
| 286 | Eurasia    | 2012-09-29 | 2013-01-26 | 12 | 349753 | 4 | 453 | 3 |
| 287 | N. America | 1996-09-23 | 1997-05-30 | 25 | 210905 | 4 | 503 | 3 |
| 288 | Eurasia    | 2015-08-25 | 2016-03-21 | 21 | 262572 | 4 | 394 | 4 |
| 289 | N. America | 2020-08-28 | 2021-06-23 | 30 | 163074 | 4 | 449 | 3 |
| 290 | S. America | 1991-02-12 | 1991-05-22 | 10 | 407781 | 4 | 279 | 4 |
| 291 | S. America | 2004-01-25 | 2004-05-03 | 10 | 545801 | 4 | 276 | 4 |
| 292 | Australia  | 2018-12-07 | 2019-04-05 | 12 | 486366 | 4 | 153 | 5 |
| 293 | Australia  | 1999-02-20 | 1999-11-16 | 27 | 275696 | 4 | 448 | 3 |
| 294 | N. America | 2002-10-12 | 2002-12-30 | 8  | 548916 | 4 | 142 | 5 |
| 295 | Eurasia    | 2017-10-23 | 2018-04-20 | 18 | 271398 | 4 | 545 | 2 |
| 296 | N. America | 2007-09-06 | 2008-05-12 | 25 | 157524 | 4 | 552 | 2 |
| 297 | Australia  | 2019-07-15 | 2020-01-10 | 18 | 434489 | 4 | 355 | 4 |
| 298 | Australia  | 1994-04-27 | 1994-12-12 | 23 | 345308 | 4 | 364 | 4 |
| 299 | N. America | 2005-07-08 | 2005-10-05 | 9  | 412914 | 4 | 429 | 3 |
| 300 | Eurasia    | 2019-04-26 | 2019-08-03 | 10 | 464725 | 4 | 250 | 4 |
| 301 | Eurasia    | 2011-07-17 | 2011-10-24 | 10 | 561667 | 4 | 130 | 5 |
| 302 | N. America | 2018-10-08 | 2019-03-16 | 16 | 193498 | 4 | 575 | 2 |
| 303 | Eurasia    | 2014-06-01 | 2014-09-08 | 10 | 414588 | 4 | 424 | 3 |
| 304 | Africa     | 1998-11-12 | 1999-03-11 | 12 | 554006 | 4 | 131 | 5 |
| 305 | N. America | 2008-12-09 | 2009-04-17 | 13 | 350255 | 4 | 500 | 3 |
| 306 | Australia  | 1985-12-20 | 1986-05-08 | 14 | 362695 | 4 | 256 | 4 |
| 307 | N. America | 1990-08-26 | 1991-04-22 | 24 | 203095 | 4 | 560 | 2 |

|     |            |            |            |    |         |   |     |   |
|-----|------------|------------|------------|----|---------|---|-----|---|
| 308 | S. America | 2011-05-18 | 2011-09-24 | 13 | 325133  | 4 | 422 | 3 |
| 309 | S. America | 2018-05-11 | 2018-12-06 | 21 | 364321  | 4 | 375 | 4 |
| 310 | N. America | 2005-01-29 | 2005-05-08 | 10 | 364884  | 4 | 383 | 4 |
| 311 | Eurasia    | 2019-10-03 | 2020-02-29 | 15 | 291072  | 4 | 326 | 4 |
| 312 | N. America | 1991-06-22 | 1991-09-19 | 9  | 366385  | 4 | 359 | 4 |
| 313 | Eurasia    | 1988-09-25 | 1989-02-01 | 13 | 253546  | 4 | 407 | 4 |
| 314 | N. America | 2002-07-04 | 2002-10-11 | 10 | 291993  | 4 | 414 | 3 |
| 315 | Eurasia    | 1986-03-20 | 1986-05-28 | 7  | 311442  | 4 | 393 | 4 |
| 316 | Eurasia    | 2001-10-17 | 2002-03-25 | 16 | 227775  | 4 | 292 | 4 |
| 317 | N. America | 2005-10-06 | 2006-03-14 | 16 | 273121  | 4 | 334 | 4 |
| 318 | S. America | 2017-10-23 | 2018-02-19 | 12 | 525436  | 4 | 151 | 5 |
| 319 | Eurasia    | 2021-11-01 | 2022-03-20 | 14 | 269462  | 4 | 369 | 4 |
| 320 | Eurasia    | 2019-06-25 | 2019-10-02 | 10 | 417168  | 4 | 365 | 4 |
| 321 | N. America | 2002-12-01 | 2003-04-29 | 15 | 397777  | 4 | 267 | 4 |
| 322 | Eurasia    | 2000-12-21 | 2001-04-19 | 12 | 377167  | 4 | 301 | 4 |
| 323 | Eurasia    | 2016-01-22 | 2016-04-10 | 8  | 755939  | 4 | 160 | 5 |
| 324 | Eurasia    | 2005-09-26 | 2006-02-22 | 15 | 336222  | 4 | 406 | 4 |
| 325 | S. America | 2020-02-20 | 2020-06-18 | 12 | 312538  | 4 | 512 | 2 |
| 326 | Eurasia    | 1997-08-09 | 1997-12-26 | 14 | 335715  | 4 | 543 | 2 |
| 327 | Eurasia    | 2005-08-27 | 2006-05-13 | 26 | 160001  | 4 | 510 | 2 |
| 328 | Eurasia    | 1998-12-22 | 1999-04-20 | 12 | 409980  | 4 | 275 | 4 |
| 329 | Africa     | 1980-10-27 | 1981-01-24 | 9  | 466961  | 4 | 320 | 4 |
| 330 | Eurasia    | 1991-07-02 | 1991-12-18 | 17 | 297383  | 4 | 183 | 5 |
| 331 | N. America | 2010-05-23 | 2010-08-10 | 8  | 464747  | 4 | 118 | 6 |
| 332 | N. America | 2011-08-06 | 2012-06-10 | 31 | 116415  | 4 | 611 | 1 |
| 333 | Eurasia    | 2012-07-31 | 2013-05-06 | 28 | 122811  | 4 | 417 | 3 |
| 334 | Eurasia    | 2020-05-30 | 2020-07-18 | 5  | 412360  | 4 | 328 | 4 |
| 335 | N. America | 2006-06-13 | 2006-10-10 | 12 | 424765  | 4 | 302 | 4 |
| 336 | Eurasia    | 2006-06-23 | 2006-09-30 | 10 | 275913  | 4 | 69  | 6 |
| 337 | Eurasia    | 2004-10-21 | 2005-02-27 | 13 | 403542  | 4 | 187 | 5 |
| 338 | N. America | 1982-09-27 | 1983-06-03 | 25 | 112667  | 4 | 434 | 3 |
| 339 | Eurasia    | 1985-07-23 | 1985-10-10 | 8  | 267361  | 4 | 455 | 3 |
| 340 | N. America | 2011-08-16 | 2011-11-23 | 10 | 357127  | 4 | 277 | 4 |
| 341 | N. America | 1993-04-12 | 1993-06-30 | 8  | 393740  | 4 | 246 | 4 |
| 342 | Eurasia    | 1987-09-11 | 1988-06-16 | 28 | 279728  | 4 | 349 | 4 |
| 343 | Eurasia    | 2007-05-09 | 2007-09-05 | 12 | 385392  | 4 | 206 | 5 |
| 344 | Africa     | 2008-09-10 | 2008-12-08 | 9  | 468140  | 4 | 377 | 4 |
| 345 | Eurasia    | 1993-12-08 | 1994-03-17 | 10 | 328253  | 4 | 475 | 3 |
| 346 | N. America | 1992-08-25 | 1993-05-31 | 28 | 92732   | 4 | 586 | 2 |
| 347 | S. America | 1999-05-01 | 1999-08-28 | 12 | 191693  | 4 | 437 | 3 |
| 348 | N. America | 2014-07-31 | 2014-10-18 | 8  | 307109  | 4 | 523 | 2 |
| 349 | N. America | 1990-09-05 | 1991-01-02 | 12 | 328570  | 4 | 212 | 5 |
| 350 | S. America | 1980-02-10 | 1980-03-30 | 5  | 1030207 | 4 | 199 | 5 |
| 351 | Eurasia    | 2003-06-29 | 2003-10-06 | 10 | 209450  | 4 | 480 | 3 |
| 352 | Eurasia    | 1992-06-06 | 1992-08-04 | 6  | 759944  | 4 | 107 | 6 |



|     |            |            |            |    |        |   |     |   |
|-----|------------|------------|------------|----|--------|---|-----|---|
| 353 | Eurasia    | 2007-11-05 | 2008-02-02 | 9  | 561279 | 4 | 370 | 4 |
| 354 | N. America | 2002-01-15 | 2002-05-14 | 12 | 434527 | 4 | 387 | 4 |
| 355 | Australia  | 2005-03-30 | 2005-06-07 | 7  | 489628 | 4 | 485 | 3 |
| 356 | Africa     | 2003-10-07 | 2004-01-14 | 10 | 375377 | 4 | 339 | 4 |
| 357 | Eurasia    | 2009-01-08 | 2009-03-18 | 7  | 494237 | 4 | 165 | 5 |
| 358 | N. America | 2019-06-15 | 2019-09-22 | 10 | 437266 | 4 | 27  | 7 |
| 359 | Eurasia    | 2022-07-09 | 2022-09-16 | 7  | 465757 | 4 | 346 | 4 |
| 360 | N. America | 2010-09-10 | 2011-06-16 | 28 | 112137 | 4 | 612 | 1 |
| 361 | Eurasia    | 2014-05-12 | 2014-10-28 | 17 | 320292 | 4 | 321 | 4 |
| 362 | N. America | 1998-06-15 | 1998-09-12 | 9  | 373536 | 4 | 174 | 5 |
| 363 | Australia  | 2008-03-14 | 2008-06-11 | 9  | 580034 | 4 | 180 | 5 |
| 364 | Eurasia    | 1991-05-13 | 1991-07-31 | 8  | 493605 | 4 | 304 | 4 |
| 365 | Eurasia    | 2019-03-07 | 2019-06-04 | 9  | 465671 | 4 | 166 | 5 |
| 366 | N. America | 1989-10-20 | 1990-05-07 | 20 | 168214 | 4 | 551 | 2 |
| 367 | Africa     | 2020-10-17 | 2021-02-13 | 12 | 247982 | 4 | 441 | 3 |
| 368 | Africa     | 2021-11-11 | 2022-02-08 | 9  | 322529 | 4 | 421 | 3 |
| 369 | Eurasia    | 1982-12-26 | 1983-06-23 | 18 | 294410 | 4 | 535 | 2 |
| 370 | Eurasia    | 2003-11-06 | 2004-04-03 | 15 | 162099 | 4 | 542 | 2 |
| 371 | Eurasia    | 2000-09-12 | 2001-05-19 | 25 | 116621 | 4 | 558 | 2 |
| 372 | Eurasia    | 2011-10-15 | 2012-04-01 | 17 | 181352 | 4 | 564 | 2 |
| 373 | S. America | 1999-10-18 | 2000-02-14 | 12 | 328652 | 4 | 286 | 4 |
| 374 | N. America | 1998-06-05 | 1998-09-12 | 10 | 144057 | 4 | 548 | 2 |
| 375 | Eurasia    | 2012-08-30 | 2013-05-06 | 25 | 88803  | 4 | 574 | 2 |
| 376 | N. America | 2002-10-22 | 2003-02-18 | 12 | 228397 | 4 | 571 | 2 |
| 377 | Africa     | 2018-11-07 | 2019-05-25 | 20 | 320280 | 4 | 430 | 3 |
| 378 | Eurasia    | 1992-10-14 | 1992-12-22 | 7  | 540009 | 4 | 269 | 4 |
| 379 | N. America | 1982-09-27 | 1983-04-24 | 21 | 116718 | 4 | 601 | 1 |
| 380 | S. America | 1989-04-13 | 1989-07-01 | 8  | 325706 | 4 | 411 | 3 |
| 381 | Eurasia    | 2012-09-29 | 2013-01-16 | 11 | 260622 | 4 | 473 | 3 |
| 382 | Eurasia    | 1990-09-25 | 1991-06-11 | 26 | 103702 | 4 | 537 | 2 |
| 383 | Eurasia    | 2002-09-22 | 2003-02-18 | 15 | 192849 | 4 | 554 | 2 |
| 384 | Eurasia    | 2010-07-02 | 2010-08-30 | 6  | 276676 | 4 | 469 | 3 |
| 385 | N. America | 1989-09-20 | 1990-06-16 | 27 | 94069  | 4 | 588 | 2 |
| 386 | Eurasia    | 2016-07-30 | 2016-10-07 | 7  | 415114 | 4 | 445 | 3 |
| 387 | Africa     | 2011-09-05 | 2012-04-01 | 21 | 287848 | 4 | 235 | 4 |
| 388 | N. America | 1996-02-16 | 1996-07-14 | 15 | 268281 | 4 | 476 | 3 |
| 389 | Australia  | 2020-06-19 | 2020-12-15 | 18 | 270687 | 4 | 559 | 2 |
| 390 | Africa     | 2017-11-02 | 2018-02-09 | 10 | 483816 | 4 | 111 | 6 |
| 391 | Eurasia    | 1985-10-01 | 1985-12-29 | 9  | 321013 | 4 | 378 | 4 |
| 392 | Eurasia    | 1998-12-22 | 1999-03-11 | 8  | 426468 | 4 | 299 | 4 |
| 393 | N. America | 1989-07-02 | 1989-09-19 | 8  | 350837 | 4 | 189 | 5 |
| 394 | N. America | 2018-09-28 | 2019-06-04 | 25 | 134589 | 4 | 533 | 2 |
| 395 | Eurasia    | 1981-10-22 | 1981-12-20 | 6  | 430310 | 4 | 544 | 2 |
| 396 | N. America | 2011-10-25 | 2012-04-21 | 18 | 228451 | 4 | 392 | 4 |
| 397 | Australia  | 2009-08-16 | 2009-12-23 | 13 | 234067 | 4 | 516 | 2 |

|     |            |            |            |    |        |   |     |   |
|-----|------------|------------|------------|----|--------|---|-----|---|
| 398 | Eurasia    | 2019-10-23 | 2020-02-09 | 11 | 234365 | 4 | 253 | 4 |
| 399 | Eurasia    | 1999-02-10 | 1999-05-10 | 9  | 386473 | 4 | 222 | 4 |
| 400 | Eurasia    | 2022-09-07 | 2022-12-25 | 11 | 236896 | 4 | 589 | 2 |
| 401 | Eurasia    | 1998-10-23 | 1999-04-10 | 17 | 226274 | 4 | 576 | 2 |
| 402 | N. America | 2004-09-01 | 2005-04-28 | 24 | 89566  | 4 | 595 | 2 |
| 403 | Eurasia    | 1997-07-30 | 1997-11-16 | 11 | 307540 | 4 | 376 | 4 |
| 404 | Eurasia    | 1997-11-17 | 1998-02-24 | 10 | 227051 | 4 | 358 | 4 |
| 405 | Australia  | 1986-03-20 | 1986-06-17 | 9  | 360418 | 4 | 389 | 4 |
| 406 | Eurasia    | 2010-11-09 | 2011-01-07 | 6  | 576475 | 4 | 197 | 5 |
| 407 | N. America | 2019-07-05 | 2019-10-12 | 10 | 263001 | 4 | 497 | 3 |
| 408 | Eurasia    | 1986-11-05 | 1987-02-12 | 10 | 229206 | 4 | 496 | 3 |
| 409 | Eurasia    | 1983-07-14 | 1983-10-11 | 9  | 280412 | 4 | 538 | 2 |
| 410 | Australia  | 2016-02-21 | 2016-05-30 | 10 | 331962 | 3 | 257 | 4 |
| 411 | Eurasia    | 2021-03-16 | 2021-05-24 | 7  | 382228 | 3 | 298 | 4 |
| 412 | Eurasia    | 2002-06-24 | 2002-12-20 | 18 | 217317 | 3 | 541 | 2 |
| 413 | N. America | 1989-07-02 | 1989-09-09 | 7  | 289437 | 3 | 232 | 4 |
| 414 | S. America | 2022-08-28 | 2022-12-05 | 10 | 228823 | 3 | 478 | 3 |
| 415 | Africa     | 2002-12-21 | 2003-02-18 | 6  | 508288 | 3 | 388 | 4 |
| 416 | Africa     | 1983-02-04 | 1983-05-04 | 9  | 405141 | 3 | 391 | 4 |
| 417 | N. America | 2010-09-20 | 2011-05-17 | 24 | 88544  | 3 | 508 | 2 |
| 418 | Eurasia    | 1980-07-19 | 1980-10-06 | 8  | 253207 | 3 | 420 | 3 |
| 419 | Eurasia    | 1981-10-02 | 1982-04-29 | 21 | 91220  | 3 | 592 | 2 |
| 420 | S. America | 2016-05-31 | 2016-08-28 | 9  | 219874 | 3 | 489 | 3 |
| 421 | S. America | 2018-04-21 | 2018-08-08 | 11 | 390176 | 3 | 442 | 3 |
| 422 | Eurasia    | 1997-07-10 | 1997-11-26 | 14 | 242627 | 3 | 357 | 4 |
| 423 | Eurasia    | 2005-11-15 | 2006-03-14 | 12 | 197175 | 3 | 598 | 2 |
| 424 | N. America | 1996-07-05 | 1996-09-22 | 8  | 167110 | 3 | 433 | 3 |
| 425 | Eurasia    | 1982-01-10 | 1982-06-08 | 15 | 130974 | 3 | 562 | 2 |
| 426 | S. America | 1995-05-22 | 1995-09-28 | 13 | 202720 | 3 | 466 | 3 |
| 427 | Africa     | 2018-04-21 | 2018-06-29 | 7  | 435156 | 3 | 260 | 4 |
| 428 | Eurasia    | 1993-09-09 | 1994-04-26 | 23 | 89450  | 3 | 578 | 2 |
| 429 | N. America | 2004-08-22 | 2004-10-20 | 6  | 222088 | 3 | 618 | 1 |
| 430 | Eurasia    | 1998-03-17 | 1998-06-04 | 8  | 483515 | 3 | 233 | 4 |
| 431 | N. America | 1992-12-03 | 1993-03-22 | 11 | 183861 | 3 | 348 | 4 |
| 432 | Australia  | 2015-09-24 | 2016-01-21 | 12 | 379664 | 3 | 237 | 4 |
| 433 | Australia  | 1997-12-27 | 1998-03-26 | 9  | 326214 | 3 | 374 | 4 |
| 434 | S. America | 2002-10-22 | 2003-01-19 | 9  | 338906 | 3 | 517 | 2 |
| 435 | Eurasia    | 1982-09-27 | 1983-02-13 | 14 | 300528 | 3 | 329 | 4 |
| 436 | Eurasia    | 2001-09-27 | 2002-05-24 | 24 | 67861  | 3 | 597 | 2 |
| 437 | Eurasia    | 1994-08-05 | 1994-10-03 | 6  | 273617 | 3 | 229 | 4 |
| 438 | Eurasia    | 2009-03-29 | 2009-06-26 | 9  | 354528 | 3 | 327 | 4 |
| 439 | Eurasia    | 2008-11-29 | 2009-02-26 | 9  | 284848 | 3 | 384 | 4 |
| 440 | N. America | 2022-05-20 | 2022-08-27 | 10 | 211625 | 3 | 506 | 2 |
| 441 | Eurasia    | 2005-10-16 | 2006-04-13 | 18 | 127092 | 3 | 530 | 2 |
| 442 | N. America | 2021-06-24 | 2021-09-01 | 7  | 281096 | 3 | 462 | 3 |

|     |            |            |            |    |        |   |     |   |
|-----|------------|------------|------------|----|--------|---|-----|---|
| 443 | Eurasia    | 1996-02-26 | 1996-05-25 | 9  | 338925 | 3 | 268 | 4 |
| 444 | Eurasia    | 2022-09-27 | 2022-12-15 | 8  | 243204 | 3 | 556 | 2 |
| 445 | Eurasia    | 1990-09-25 | 1991-01-12 | 11 | 209239 | 3 | 521 | 2 |
| 446 | Eurasia    | 2013-04-07 | 2013-06-25 | 8  | 306444 | 3 | 493 | 3 |
| 447 | N. America | 2005-07-18 | 2005-09-05 | 5  | 311199 | 3 | 385 | 4 |
| 448 | Africa     | 2015-01-07 | 2015-03-17 | 7  | 491171 | 3 | 313 | 4 |
| 449 | Eurasia    | 2020-12-16 | 2021-04-14 | 12 | 219646 | 3 | 581 | 2 |
| 450 | Africa     | 2018-01-01 | 2018-06-19 | 17 | 251274 | 3 | 412 | 3 |
| 451 | N. America | 1980-01-01 | 1980-03-20 | 8  | 209689 | 3 | 609 | 1 |
| 452 | Eurasia    | 1994-09-24 | 1995-05-21 | 24 | 75820  | 3 | 610 | 1 |
| 453 | Eurasia    | 1980-01-01 | 1980-04-19 | 11 | 145605 | 3 | 625 | 1 |
| 454 | S. America | 2010-10-30 | 2011-01-27 | 9  | 302209 | 3 | 484 | 3 |
| 455 | S. America | 1983-04-25 | 1983-08-02 | 10 | 501865 | 3 | 308 | 4 |
| 456 | Africa     | 2011-06-07 | 2011-09-14 | 10 | 306547 | 3 | 270 | 4 |
| 457 | Eurasia    | 2015-07-06 | 2015-09-13 | 7  | 398391 | 3 | 248 | 4 |
| 458 | Eurasia    | 2013-06-26 | 2013-09-03 | 7  | 379152 | 3 | 335 | 4 |
| 459 | S. America | 2021-12-11 | 2022-02-28 | 8  | 343713 | 3 | 413 | 3 |
| 460 | Eurasia    | 2001-10-07 | 2002-05-04 | 21 | 76679  | 3 | 624 | 1 |
| 461 | Eurasia    | 1993-07-11 | 1993-08-29 | 5  | 513741 | 3 | 124 | 6 |
| 462 | Australia  | 1999-06-30 | 1999-10-27 | 12 | 188809 | 3 | 565 | 2 |
| 463 | Eurasia    | 2010-03-24 | 2010-07-11 | 11 | 204845 | 3 | 527 | 2 |
| 464 | Eurasia    | 1980-01-11 | 1980-03-30 | 8  | 215657 | 3 | 488 | 3 |
| 465 | N. America | 2005-12-05 | 2006-05-13 | 16 | 189260 | 3 | 518 | 2 |
| 466 | Africa     | 1998-12-22 | 1999-03-21 | 9  | 240390 | 3 | 604 | 1 |
| 467 | Eurasia    | 2021-03-16 | 2021-05-14 | 6  | 472149 | 3 | 289 | 4 |
| 468 | Eurasia    | 2003-11-16 | 2004-02-03 | 8  | 360597 | 3 | 367 | 4 |
| 469 | Australia  | 2005-02-28 | 2005-06-17 | 11 | 238739 | 3 | 294 | 4 |
| 470 | Africa     | 2016-10-08 | 2016-12-26 | 8  | 462976 | 3 | 220 | 5 |
| 471 | N. America | 2007-07-08 | 2007-09-25 | 8  | 282700 | 3 | 479 | 3 |
| 472 | N. America | 1984-09-16 | 1985-04-13 | 21 | 99043  | 3 | 602 | 1 |
| 473 | Eurasia    | 1980-01-11 | 1980-04-19 | 10 | 107524 | 3 | 615 | 1 |
| 474 | Eurasia    | 1982-09-07 | 1983-01-04 | 12 | 256219 | 3 | 405 | 4 |
| 475 | N. America | 1986-03-30 | 1986-05-18 | 5  | 476914 | 3 | 284 | 4 |
| 476 | Africa     | 2014-06-21 | 2014-09-08 | 8  | 345535 | 3 | 490 | 3 |
| 477 | Africa     | 2018-12-27 | 2019-03-16 | 8  | 402464 | 3 | 93  | 6 |
| 478 | Australia  | 2017-07-15 | 2017-10-02 | 8  | 480110 | 3 | 228 | 4 |
| 479 | Africa     | 1980-01-01 | 1980-04-09 | 10 | 238422 | 3 | 425 | 3 |
| 480 | N. America | 2007-06-28 | 2007-09-15 | 8  | 249192 | 3 | 403 | 4 |
| 481 | Africa     | 2017-10-13 | 2018-03-01 | 14 | 198923 | 3 | 482 | 3 |
| 482 | Eurasia    | 1980-07-19 | 1980-09-06 | 5  | 278990 | 3 | 219 | 5 |
| 483 | Africa     | 2010-10-10 | 2011-01-07 | 9  | 384122 | 3 | 342 | 4 |
| 484 | N. America | 2014-10-09 | 2015-04-26 | 20 | 73036  | 3 | 626 | 1 |
| 485 | Eurasia    | 1990-08-06 | 1990-10-24 | 8  | 235193 | 3 | 481 | 3 |
| 486 | S. America | 1981-05-15 | 1981-08-22 | 10 | 389001 | 3 | 249 | 4 |
| 487 | Australia  | 2021-12-11 | 2022-02-08 | 6  | 308924 | 3 | 580 | 2 |

|     |            |            |            |    |        |   |     |   |
|-----|------------|------------|------------|----|--------|---|-----|---|
| 488 | Eurasia    | 1981-10-12 | 1982-04-09 | 18 | 84016  | 3 | 619 | 1 |
| 489 | S. America | 1989-01-23 | 1989-04-12 | 8  | 261425 | 3 | 540 | 2 |
| 490 | Eurasia    | 2021-08-23 | 2021-11-20 | 9  | 176724 | 3 | 504 | 3 |
| 491 | Africa     | 2014-06-11 | 2014-08-19 | 7  | 466627 | 3 | 104 | 6 |
| 492 | Eurasia    | 2017-06-25 | 2017-08-23 | 6  | 357192 | 3 | 451 | 3 |
| 493 | Africa     | 2010-09-30 | 2010-12-28 | 9  | 412066 | 3 | 217 | 5 |
| 494 | S. America | 2018-12-27 | 2019-04-15 | 11 | 279945 | 3 | 501 | 3 |
| 495 | Eurasia    | 2014-07-01 | 2014-09-18 | 8  | 294272 | 3 | 613 | 1 |
| 496 | N. America | 1987-04-24 | 1987-06-22 | 6  | 566234 | 3 | 108 | 6 |
| 497 | Eurasia    | 1990-09-15 | 1991-02-21 | 16 | 109605 | 3 | 539 | 2 |
| 498 | Eurasia    | 2010-11-19 | 2011-01-17 | 6  | 387191 | 3 | 522 | 2 |
| 499 | Eurasia    | 2021-03-16 | 2021-05-24 | 7  | 353443 | 3 | 287 | 4 |
| 500 | Eurasia    | 2000-06-24 | 2000-10-11 | 11 | 264975 | 3 | 181 | 5 |
| 501 | Australia  | 2016-02-11 | 2016-05-10 | 9  | 249991 | 3 | 603 | 1 |
| 502 | N. America | 1983-10-12 | 1984-01-29 | 11 | 168841 | 3 | 577 | 2 |
| 503 | Eurasia    | 2009-01-18 | 2009-03-08 | 5  | 418627 | 2 | 317 | 4 |
| 504 | Australia  | 2015-11-13 | 2016-01-31 | 8  | 285215 | 2 | 459 | 3 |
| 505 | N. America | 2020-08-08 | 2020-10-16 | 7  | 224253 | 2 | 561 | 2 |
| 506 | Africa     | 1989-11-19 | 1989-12-28 | 4  | 452554 | 2 | 585 | 2 |
| 507 | Australia  | 2022-02-19 | 2022-04-29 | 7  | 261336 | 2 | 291 | 4 |
| 508 | Eurasia    | 1996-01-07 | 1996-05-05 | 12 | 139760 | 2 | 607 | 1 |
| 509 | Africa     | 2005-03-30 | 2005-06-17 | 8  | 303199 | 2 | 553 | 2 |
| 510 | Eurasia    | 1993-07-21 | 1993-10-18 | 9  | 136984 | 2 | 386 | 4 |
| 511 | N. America | 2010-08-01 | 2010-10-09 | 7  | 181665 | 2 | 185 | 5 |
| 512 | Eurasia    | 1981-06-14 | 1981-07-23 | 4  | 331235 | 2 | 509 | 2 |
| 513 | Eurasia    | 2007-07-18 | 2007-08-16 | 3  | 674441 | 2 | 395 | 4 |
| 514 | Eurasia    | 2009-09-25 | 2010-01-02 | 10 | 260606 | 2 | 446 | 3 |
| 515 | Eurasia    | 1990-07-27 | 1990-10-24 | 9  | 147775 | 2 | 584 | 2 |
| 516 | Eurasia    | 2018-08-19 | 2018-10-17 | 6  | 221278 | 2 | 356 | 4 |
| 517 | Australia  | 2005-02-18 | 2005-05-08 | 8  | 340950 | 2 | 536 | 2 |
| 518 | Australia  | 2004-05-24 | 2004-09-20 | 12 | 242472 | 2 | 513 | 2 |
| 519 | Eurasia    | 1998-11-02 | 1999-03-01 | 12 | 151376 | 2 | 599 | 1 |
| 520 | Africa     | 1993-05-22 | 1993-09-28 | 13 | 208054 | 2 | 526 | 2 |
| 521 | Eurasia    | 2008-10-10 | 2009-02-06 | 12 | 209800 | 2 | 590 | 2 |
| 522 | Eurasia    | 2013-07-26 | 2013-09-03 | 4  | 234699 | 2 | 460 | 3 |
| 523 | Australia  | 2006-06-23 | 2006-08-31 | 7  | 309432 | 2 | 221 | 5 |
| 524 | Eurasia    | 1999-10-18 | 2000-02-14 | 12 | 137656 | 2 | 605 | 1 |
| 525 | N. America | 2011-10-15 | 2012-02-01 | 11 | 204445 | 2 | 582 | 2 |
| 526 | N. America | 1980-01-01 | 1980-04-09 | 10 | 143397 | 2 | 566 | 2 |
| 527 | N. America | 1995-06-11 | 1995-07-30 | 5  | 261067 | 2 | 621 | 1 |
| 528 | S. America | 2004-10-31 | 2005-01-18 | 8  | 371690 | 2 | 35  | 6 |
| 529 | Africa     | 2006-06-23 | 2006-08-31 | 7  | 355584 | 2 | 32  | 7 |
| 530 | Eurasia    | 2020-11-16 | 2021-02-13 | 9  | 134013 | 2 | 546 | 2 |
| 531 | N. America | 1983-09-02 | 1983-12-20 | 11 | 125191 | 2 | 507 | 2 |
| 532 | Australia  | 2010-01-13 | 2010-03-13 | 6  | 413400 | 2 | 243 | 4 |

|     |            |            |            |    |        |   |     |   |
|-----|------------|------------|------------|----|--------|---|-----|---|
| 533 | S. America | 1997-04-01 | 1997-05-30 | 6  | 303441 | 2 | 583 | 2 |
| 534 | S. America | 2004-11-10 | 2005-01-08 | 6  | 392239 | 2 | 494 | 3 |
| 535 | Australia  | 1994-05-17 | 1994-09-03 | 11 | 251794 | 2 | 373 | 4 |
| 536 | Eurasia    | 2005-09-16 | 2005-12-24 | 10 | 137783 | 2 | 569 | 2 |
| 537 | Eurasia    | 1992-12-13 | 1993-03-02 | 8  | 352152 | 2 | 350 | 4 |
| 538 | Eurasia    | 2014-07-11 | 2014-09-28 | 8  | 243288 | 2 | 368 | 4 |
| 539 | N. America | 2019-07-25 | 2019-10-02 | 7  | 322404 | 2 | 266 | 4 |
| 540 | Eurasia    | 2013-06-26 | 2013-08-04 | 4  | 312647 | 2 | 587 | 2 |
| 541 | S. America | 2015-05-17 | 2015-08-04 | 8  | 272711 | 2 | 351 | 4 |
| 542 | S. America | 1995-04-12 | 1995-06-10 | 6  | 495282 | 2 | 72  | 6 |
| 543 | Africa     | 2007-02-08 | 2007-04-18 | 7  | 372996 | 2 | 400 | 4 |
| 544 | Eurasia    | 2016-07-10 | 2016-09-07 | 6  | 277093 | 2 | 474 | 3 |
| 545 | Eurasia    | 2005-11-15 | 2006-04-03 | 14 | 108228 | 2 | 591 | 2 |
| 546 | Eurasia    | 2008-06-22 | 2008-09-19 | 9  | 222160 | 2 | 532 | 2 |
| 547 | Eurasia    | 2022-11-06 | 2022-12-25 | 5  | 395733 | 2 | 239 | 4 |
| 548 | Africa     | 2016-12-27 | 2017-02-24 | 6  | 336583 | 2 | 324 | 4 |
| 549 | Eurasia    | 2015-01-07 | 2015-03-17 | 7  | 391981 | 2 | 366 | 4 |
| 550 | Eurasia    | 2020-01-01 | 2020-03-10 | 7  | 357277 | 2 | 360 | 4 |
| 551 | Eurasia    | 1981-07-14 | 1981-09-21 | 7  | 228244 | 2 | 281 | 4 |
| 552 | Eurasia    | 2016-04-11 | 2016-05-20 | 4  | 413742 | 2 | 596 | 2 |
| 553 | Australia  | 1981-03-26 | 1981-05-24 | 6  | 317638 | 2 | 463 | 3 |
| 554 | N. America | 2018-07-20 | 2018-09-17 | 6  | 266913 | 2 | 382 | 4 |
| 555 | Eurasia    | 2011-07-17 | 2011-10-14 | 9  | 256637 | 2 | 461 | 3 |
| 556 | N. America | 1989-01-23 | 1989-03-23 | 6  | 385169 | 2 | 436 | 3 |
| 557 | N. America | 1985-06-13 | 1985-08-11 | 6  | 306048 | 2 | 263 | 4 |
| 558 | N. America | 2013-09-04 | 2013-11-02 | 6  | 295746 | 2 | 491 | 3 |
| 559 | Eurasia    | 2016-07-10 | 2016-09-17 | 7  | 162858 | 2 | 330 | 4 |
| 560 | Africa     | 1989-11-19 | 1990-01-17 | 6  | 394014 | 2 | 58  | 6 |
| 561 | Eurasia    | 2000-11-11 | 2001-03-10 | 12 | 112080 | 2 | 623 | 1 |
| 562 | Eurasia    | 2013-04-07 | 2013-06-15 | 7  | 338970 | 2 | 264 | 4 |
| 563 | N. America | 2002-03-26 | 2002-06-23 | 9  | 171760 | 2 | 627 | 1 |
| 564 | Eurasia    | 1994-07-06 | 1994-08-24 | 5  | 343536 | 2 | 325 | 4 |
| 565 | N. America | 1998-05-16 | 1998-07-14 | 6  | 307177 | 2 | 498 | 3 |
| 566 | Australia  | 2018-04-11 | 2018-06-09 | 6  | 357630 | 2 | 401 | 4 |
| 567 | Africa     | 2000-02-15 | 2000-05-04 | 8  | 249032 | 2 | 361 | 4 |
| 568 | N. America | 1981-05-15 | 1981-08-02 | 8  | 182898 | 2 | 427 | 3 |
| 569 | Africa     | 1991-08-21 | 1991-11-18 | 9  | 280953 | 2 | 408 | 4 |
| 570 | N. America | 2006-05-24 | 2006-08-11 | 8  | 236140 | 2 | 319 | 4 |
| 571 | Eurasia    | 2007-10-16 | 2008-01-03 | 8  | 251540 | 2 | 303 | 4 |
| 572 | Australia  | 2020-09-07 | 2020-12-05 | 9  | 233897 | 2 | 531 | 2 |
| 573 | Eurasia    | 2002-11-11 | 2002-12-30 | 5  | 279636 | 2 | 593 | 2 |
| 574 | Eurasia    | 2009-01-18 | 2009-03-18 | 6  | 254536 | 2 | 418 | 3 |
| 575 | N. America | 1991-06-22 | 1991-08-10 | 5  | 267860 | 2 | 399 | 4 |
| 576 | Eurasia    | 1983-08-03 | 1983-10-21 | 8  | 160368 | 2 | 470 | 3 |
| 577 | S. America | 2012-05-12 | 2012-07-10 | 6  | 303647 | 2 | 341 | 4 |

|     |            |            |            |    |        |   |     |   |
|-----|------------|------------|------------|----|--------|---|-----|---|
| 578 | Eurasia    | 2015-09-14 | 2015-11-12 | 6  | 353645 | 2 | 215 | 5 |
| 579 | N. America | 1998-10-13 | 1999-02-19 | 13 | 63649  | 2 | 616 | 1 |
| 580 | Eurasia    | 2018-07-10 | 2018-10-17 | 10 | 164857 | 2 | 614 | 1 |
| 581 | Eurasia    | 1980-07-29 | 1980-09-16 | 5  | 309509 | 2 | 99  | 6 |
| 582 | Eurasia    | 2001-04-10 | 2001-07-18 | 10 | 181941 | 2 | 511 | 2 |
| 583 | Eurasia    | 2014-07-11 | 2014-09-08 | 6  | 191682 | 2 | 467 | 3 |
| 584 | Africa     | 2022-11-06 | 2022-12-25 | 5  | 389579 | 2 | 423 | 3 |
| 585 | Eurasia    | 1992-04-27 | 1992-06-15 | 5  | 376789 | 2 | 169 | 5 |
| 586 | Australia  | 1992-02-07 | 1992-04-06 | 6  | 301962 | 2 | 415 | 3 |
| 587 | N. America | 2006-10-11 | 2007-01-28 | 11 | 87598  | 2 | 620 | 1 |
| 588 | S. America | 2019-02-15 | 2019-04-25 | 7  | 309205 | 2 | 113 | 6 |
| 589 | Eurasia    | 2016-03-22 | 2016-05-30 | 7  | 238984 | 2 | 573 | 2 |
| 590 | N. America | 1980-01-01 | 1980-04-19 | 11 | 63438  | 2 | 628 | 1 |
| 591 | Africa     | 1993-02-21 | 1993-05-01 | 7  | 282577 | 2 | 617 | 1 |
| 592 | N. America | 1995-06-21 | 1995-08-19 | 6  | 275834 | 2 | 203 | 5 |
| 593 | Eurasia    | 2002-01-05 | 2002-04-24 | 11 | 62719  | 2 | 629 | 1 |
| 594 | Eurasia    | 1983-10-22 | 1983-12-30 | 7  | 175402 | 2 | 568 | 2 |
| 595 | N. America | 1984-09-16 | 1984-12-14 | 9  | 114166 | 2 | 572 | 2 |
| 596 | Eurasia    | 1982-06-19 | 1982-08-17 | 6  | 177311 | 2 | 452 | 3 |
| 597 | N. America | 2015-05-27 | 2015-08-14 | 8  | 125618 | 2 | 519 | 2 |
| 598 | Eurasia    | 2006-08-02 | 2006-09-30 | 6  | 277786 | 2 | 450 | 3 |
| 599 | Eurasia    | 1985-11-10 | 1986-02-07 | 9  | 229945 | 1 | 579 | 2 |
| 600 | Eurasia    | 1982-07-09 | 1982-09-06 | 6  | 154052 | 1 | 514 | 2 |
| 601 | Africa     | 2011-12-04 | 2012-02-11 | 7  | 344418 | 1 | 398 | 4 |
| 602 | Eurasia    | 2019-10-23 | 2019-12-11 | 5  | 309220 | 1 | 416 | 3 |
| 603 | N. America | 2019-07-05 | 2019-09-12 | 7  | 172224 | 1 | 347 | 4 |
| 604 | N. America | 2011-07-27 | 2011-10-14 | 8  | 104925 | 1 | 570 | 2 |
| 605 | Eurasia    | 2002-11-21 | 2003-01-09 | 5  | 274839 | 1 | 84  | 6 |
| 606 | Australia  | 2017-12-12 | 2018-03-01 | 8  | 267396 | 1 | 309 | 4 |
| 607 | Eurasia    | 1983-02-24 | 1983-05-04 | 7  | 285904 | 1 | 499 | 3 |
| 608 | Africa     | 2004-05-24 | 2004-08-11 | 8  | 291533 | 1 | 122 | 6 |
| 609 | Eurasia    | 2011-01-08 | 2011-04-27 | 11 | 58058  | 1 | 622 | 1 |
| 610 | S. America | 2019-03-07 | 2019-05-05 | 6  | 350548 | 1 | 353 | 4 |
| 611 | Eurasia    | 2001-07-09 | 2001-09-26 | 8  | 208838 | 1 | 123 | 6 |
| 612 | Eurasia    | 2000-07-14 | 2000-10-01 | 8  | 186784 | 1 | 486 | 3 |
| 613 | Eurasia    | 1984-05-09 | 1984-07-07 | 6  | 235448 | 1 | 396 | 4 |
| 614 | Eurasia    | 1991-08-31 | 1991-11-08 | 7  | 203270 | 1 | 278 | 4 |
| 615 | Eurasia    | 1999-02-20 | 1999-04-30 | 7  | 260870 | 1 | 59  | 6 |
| 616 | Australia  | 2005-08-17 | 2005-10-15 | 6  | 347994 | 1 | 520 | 2 |
| 617 | Eurasia    | 1986-03-10 | 1986-06-07 | 9  | 194763 | 1 | 502 | 3 |
| 618 | Eurasia    | 1989-11-09 | 1990-02-26 | 11 | 65779  | 1 | 630 | 1 |
| 619 | Australia  | 2010-09-20 | 2010-12-18 | 9  | 186818 | 1 | 547 | 2 |
| 620 | S. America | 1990-11-14 | 1991-01-22 | 7  | 194810 | 1 | 528 | 2 |
| 621 | Africa     | 2004-05-14 | 2004-07-02 | 5  | 399029 | 1 | 465 | 3 |
| 622 | Eurasia    | 1991-01-03 | 1991-04-02 | 9  | 105095 | 1 | 608 | 1 |

|     |            |            |            |   |        |   |     |   |
|-----|------------|------------|------------|---|--------|---|-----|---|
| 623 | Eurasia    | 2008-01-24 | 2008-04-12 | 8 | 176237 | 1 | 443 | 3 |
| 624 | Africa     | 2000-04-15 | 2000-07-03 | 8 | 210466 | 1 | 600 | 1 |
| 625 | Eurasia    | 2018-01-21 | 2018-04-10 | 8 | 220638 | 1 | 208 | 5 |
| 626 | Eurasia    | 1991-08-11 | 1991-10-19 | 7 | 105022 | 1 | 549 | 2 |
| 627 | Eurasia    | 2018-07-20 | 2018-09-17 | 6 | 156859 | 1 | 606 | 1 |
| 628 | Eurasia    | 2006-06-03 | 2006-08-21 | 8 | 136786 | 1 | 487 | 3 |
| 629 | N. America | 1989-07-02 | 1989-09-19 | 8 | 153101 | 1 | 78  | 6 |
| 630 | Africa     | 2004-05-24 | 2004-08-01 | 7 | 248599 | 1 | 534 | 2 |
