# Supplementary material for: Global catalog of soil moisture droughts over the past four decades
Source: Copernicus journal article supplement (doi:10.5194/hess-29-3341-2025), 2025-07-30
Supplement: Supplementary file 1 [file hess-29-3341-2025-supplement.zip]

Figure S1: The maximum extent of the three most extreme GLDEs based on SoilClim model with month of occurrence indicated.

Figure S2: All centroid positions of the mHM-based GLDE with the second largest dynamic score, which happened from June 2014–March 2015 in North America.

Animation S1: Spatiotemporal behavior of individual GLDEs during 2019 in the native 10-day step.
