# Supplementary material for: Global catalog of soil moisture droughts over the past four decades
Source: Copernicus journal article supplement (doi:10.5194/hess-29-3341-2025), 2025-07-30
Supplement: Supplementary file 2 [file hess-29-3341-2025-supplement.zip]

**Table S1. Global land drought events (GLDEs) according to SoilClim model.**

This is a result of an algorithmic, density-based clustering of drought grids based on their spatiotemporal position. The algorithm does not evaluate whether nearby GLDEs occurring at the same time were caused by one large-scale climatic event or not.

| spatiotemporal order | continent  | start      | end        | n. o. decades | max. area of GLDE (km <sup>2</sup> ) | spatiotemporal category | dynamic order | dynamic category |
|----------------------|------------|------------|------------|---------------|--------------------------------------|-------------------------|---------------|------------------|
| 1                    | Eurasia    | 2004-11-13 | 2022-12-28 | 662           | 6701638                              | 7                       | 1             | 7                |
| 2                    | S. America | 2019-05-19 | 2022-12-28 | 132           | 8522547                              | 7                       | 7             | 7                |
| 3                    | Africa     | 2014-10-12 | 2019-11-24 | 188           | 4781108                              | 7                       | 3             | 7                |
| 4                    | Africa     | 2020-02-03 | 2022-12-28 | 107           | 5923179                              | 7                       | 5             | 7                |
| 5                    | N. America | 1999-07-13 | 2004-06-15 | 180           | 2532447                              | 7                       | 8             | 7                |
| 6                    | Eurasia    | 2002-06-27 | 2004-11-22 | 88            | 3492783                              | 7                       | 11            | 7                |
| 7                    | N. America | 2010-08-24 | 2013-06-28 | 104           | 3579832                              | 7                       | 9             | 7                |
| 8                    | Eurasia    | 1991-06-25 | 1994-08-27 | 116           | 1820396                              | 7                       | 12            | 7                |
| 9                    | Eurasia    | 1982-07-02 | 1988-08-08 | 223           | 2722326                              | 7                       | 20            | 7                |
| 10                   | N. America | 2020-08-01 | 2022-12-28 | 88            | 2850866                              | 7                       | 15            | 7                |
| 11                   | S. America | 2008-04-06 | 2011-04-20 | 111           | 4320893                              | 7                       | 6             | 7                |
| 12                   | Australia  | 2018-03-25 | 2020-12-08 | 99            | 5279772                              | 7                       | 23            | 7                |
| 13                   | S. America | 2013-12-16 | 2016-04-23 | 86            | 5867391                              | 7                       | 2             | 7                |
| 14                   | N. America | 1979-12-25 | 1982-06-21 | 91            | 1561933                              | 7                       | 79            | 6                |
| 15                   | Eurasia    | 2000-02-18 | 2005-01-21 | 180           | 2455090                              | 7                       | 109           | 6                |
| 16                   | Africa     | 1983-01-08 | 1988-02-20 | 187           | 3103869                              | 7                       | 25            | 7                |
| 17                   | Eurasia    | 1984-06-11 | 1986-03-22 | 65            | 2191862                              | 7                       | 47            | 6                |
| 18                   | Eurasia    | 1982-07-02 | 1984-06-30 | 73            | 1068946                              | 7                       | 172           | 5                |
| 19                   | N. America | 1987-08-25 | 1989-09-02 | 74            | 1864738                              | 7                       | 13            | 7                |
| 20                   | N. America | 2013-08-08 | 2015-07-08 | 70            | 1102522                              | 7                       | 132           | 6                |
| 21                   | N. America | 2018-07-23 | 2019-11-24 | 49            | 1752539                              | 7                       | 16            | 7                |
| 22                   | Eurasia    | 2002-05-08 | 2003-05-22 | 38            | 1979641                              | 7                       | 82            | 6                |
| 23                   | N. America | 1990-06-30 | 1991-12-01 | 52            | 1504104                              | 7                       | 19            | 7                |
| 24                   | Eurasia    | 1986-05-12 | 1987-09-23 | 50            | 1244258                              | 7                       | 64            | 6                |
| 25                   | Africa     | 2020-01-04 | 2022-12-28 | 109           | 1125032                              | 7                       | 160           | 5                |
| 26                   | N. America | 2009-07-10 | 2011-06-19 | 71            | 692944                               | 7                       | 208           | 5                |
| 27                   | N. America | 1997-05-24 | 1999-12-29 | 95            | 641267                               | 7                       | 113           | 6                |
| 28                   | N. America | 2005-06-21 | 2006-12-22 | 55            | 1638870                              | 7                       | 30            | 7                |
| 29                   | Africa     | 1991-12-02 | 1992-12-15 | 38            | 2364756                              | 7                       | 84            | 6                |
| 30                   | Africa     | 2019-01-09 | 2020-12-28 | 72            | 1753010                              | 7                       | 34            | 7                |
| 31                   | N. America | 2007-06-11 | 2008-08-03 | 42            | 788537                               | 7                       | 100           | 6                |
| 32                   | Eurasia    | 1998-09-16 | 2001-12-08 | 118           | 985832                               | 7                       | 46            | 6                |
| 33                   | N. America | 2004-06-16 | 2005-05-31 | 35            | 1204324                              | 7                       | 130           | 6                |
| 34                   | Eurasia    | 2003-07-02 | 2004-05-06 | 31            | 1961250                              | 7                       | 86            | 6                |
| 35                   | Africa     | 2009-02-10 | 2010-03-16 | 40            | 2635026                              | 7                       | 10            | 7                |
| 36                   | Eurasia    | 2011-08-29 | 2012-12-10 | 47            | 1248742                              | 7                       | 37            | 7                |
| 37                   | S. America | 2011-12-17 | 2014-02-13 | 79            | 1235996                              | 7                       | 14            | 7                |
| 38                   | N. America | 1994-06-09 | 1996-04-08 | 67            | 696253                               | 7                       | 96            | 6                |

|    |            |            |            |    |         |   |     |   |
|----|------------|------------|------------|----|---------|---|-----|---|
| 39 | S. America | 2012-02-25 | 2013-04-19 | 42 | 2119390 | 7 | 48  | 6 |
| 40 | Eurasia    | 1989-06-25 | 1990-06-29 | 37 | 1165594 | 6 | 67  | 6 |
| 41 | Australia  | 1990-01-01 | 1991-06-04 | 52 | 1447697 | 6 | 28  | 7 |
| 42 | N. America | 2022-04-13 | 2022-12-28 | 26 | 2219243 | 6 | 17  | 7 |
| 43 | N. America | 1983-08-06 | 1985-08-24 | 75 | 389093  | 6 | 297 | 4 |
| 44 | Eurasia    | 1981-06-27 | 1982-06-21 | 36 | 657151  | 6 | 83  | 6 |
| 45 | S. America | 1997-08-02 | 1998-04-18 | 26 | 4416067 | 6 | 22  | 7 |
| 46 | Eurasia    | 2011-05-01 | 2012-06-03 | 40 | 889472  | 6 | 118 | 6 |
| 47 | Eurasia    | 1981-09-05 | 1982-10-19 | 41 | 984409  | 6 | 97  | 6 |
| 48 | Eurasia    | 2010-12-02 | 2011-11-06 | 34 | 1697856 | 6 | 73  | 6 |
| 49 | Eurasia    | 2003-03-24 | 2004-02-06 | 32 | 1432132 | 6 | 66  | 6 |
| 50 | N. America | 2001-09-10 | 2002-08-25 | 35 | 1240015 | 6 | 52  | 6 |
| 51 | Eurasia    | 1980-06-02 | 1981-02-06 | 25 | 968532  | 6 | 139 | 6 |
| 52 | Eurasia    | 2017-08-17 | 2018-05-23 | 28 | 1106433 | 6 | 241 | 5 |
| 53 | Australia  | 1985-11-23 | 1986-10-18 | 33 | 2182688 | 6 | 29  | 7 |
| 54 | Eurasia    | 1979-12-25 | 1981-07-26 | 58 | 732715  | 6 | 159 | 5 |
| 55 | Eurasia    | 1980-08-21 | 1981-06-16 | 30 | 598197  | 6 | 319 | 4 |
| 56 | N. America | 2013-06-29 | 2014-04-14 | 29 | 1707672 | 6 | 54  | 6 |
| 57 | Eurasia    | 2015-10-17 | 2016-10-10 | 36 | 662799  | 6 | 199 | 5 |
| 58 | N. America | 1980-08-21 | 1981-05-27 | 28 | 1782398 | 6 | 21  | 7 |
| 59 | Africa     | 1999-12-20 | 2000-12-03 | 35 | 1459095 | 6 | 42  | 6 |
| 60 | Australia  | 2009-06-10 | 2010-12-11 | 55 | 1064884 | 6 | 157 | 5 |
| 61 | Eurasia    | 2021-08-06 | 2022-05-22 | 29 | 695734  | 6 | 240 | 5 |
| 62 | Eurasia    | 1987-08-25 | 1988-06-19 | 30 | 947202  | 6 | 93  | 6 |
| 63 | N. America | 1981-07-17 | 1982-04-02 | 26 | 1096844 | 6 | 146 | 6 |
| 64 | S. America | 2007-03-03 | 2007-12-17 | 29 | 2366810 | 6 | 40  | 6 |
| 65 | Eurasia    | 1998-07-18 | 1999-05-03 | 29 | 970027  | 6 | 254 | 5 |
| 66 | Africa     | 1980-04-23 | 1981-10-24 | 55 | 905964  | 6 | 114 | 6 |
| 67 | N. America | 1998-08-27 | 1999-09-10 | 38 | 710385  | 6 | 63  | 6 |
| 68 | Africa     | 2005-07-01 | 2006-03-27 | 27 | 1879360 | 6 | 43  | 6 |
| 69 | Eurasia    | 2021-11-04 | 2022-12-28 | 42 | 280498  | 6 | 420 | 4 |
| 70 | Eurasia    | 1999-06-13 | 2000-03-08 | 27 | 1018421 | 6 | 128 | 6 |
| 71 | Africa     | 2001-10-10 | 2003-11-18 | 77 | 659570  | 6 | 148 | 6 |
| 72 | Africa     | 1986-12-18 | 1987-12-02 | 35 | 1172268 | 6 | 101 | 6 |
| 73 | Eurasia    | 2019-09-16 | 2020-08-20 | 34 | 1122243 | 6 | 99  | 6 |
| 74 | N. America | 1991-10-13 | 1992-12-15 | 43 | 450220  | 6 | 210 | 5 |
| 75 | Eurasia    | 2009-06-20 | 2010-04-25 | 31 | 868843  | 6 | 197 | 5 |
| 76 | Eurasia    | 2008-08-04 | 2009-05-30 | 30 | 453328  | 6 | 471 | 4 |
| 77 | Eurasia    | 2000-05-08 | 2001-06-11 | 40 | 357932  | 6 | 339 | 4 |
| 78 | N. America | 2008-08-14 | 2009-04-10 | 24 | 550036  | 6 | 305 | 4 |
| 79 | Eurasia    | 1988-08-19 | 1989-04-05 | 23 | 729648  | 6 | 110 | 6 |
| 80 | Eurasia    | 1994-06-29 | 1995-09-01 | 43 | 842944  | 6 | 76  | 6 |
| 81 | Eurasia    | 2001-06-02 | 2002-04-07 | 31 | 1054682 | 6 | 186 | 5 |
| 82 | Eurasia    | 1983-09-25 | 1984-05-11 | 23 | 1317316 | 6 | 74  | 6 |
| 83 | N. America | 1997-09-11 | 1998-09-05 | 36 | 360994  | 6 | 315 | 4 |

|     |            |            |            |    |         |   |     |   |
|-----|------------|------------|------------|----|---------|---|-----|---|
| 84  | N. America | 2013-10-17 | 2014-08-02 | 29 | 974611  | 6 | 190 | 5 |
| 85  | Eurasia    | 2022-07-02 | 2022-12-28 | 18 | 1827933 | 6 | 60  | 6 |
| 86  | N. America | 2010-06-15 | 2011-08-18 | 43 | 571851  | 6 | 182 | 5 |
| 87  | N. America | 2007-03-13 | 2007-12-27 | 29 | 1133918 | 6 | 44  | 6 |
| 88  | N. America | 1989-08-24 | 1991-03-26 | 58 | 257051  | 6 | 292 | 4 |
| 89  | N. America | 2003-07-22 | 2004-05-06 | 29 | 747003  | 6 | 178 | 5 |
| 90  | Eurasia    | 2019-06-08 | 2020-03-23 | 29 | 976481  | 6 | 126 | 6 |
| 91  | Eurasia    | 1998-07-18 | 1999-04-13 | 27 | 868107  | 6 | 62  | 6 |
| 92  | Australia  | 2002-05-28 | 2003-02-21 | 27 | 1294261 | 6 | 69  | 6 |
| 93  | Africa     | 2014-10-12 | 2015-05-19 | 22 | 1787297 | 6 | 95  | 6 |
| 94  | N. America | 1989-09-13 | 1990-05-30 | 26 | 977678  | 6 | 102 | 6 |
| 95  | Eurasia    | 2005-10-09 | 2006-04-26 | 20 | 1191465 | 6 | 125 | 6 |
| 96  | Eurasia    | 2009-08-19 | 2010-05-25 | 28 | 1081310 | 6 | 50  | 6 |
| 97  | Eurasia    | 1982-05-13 | 1983-06-26 | 41 | 699935  | 6 | 181 | 5 |
| 98  | Eurasia    | 2005-10-09 | 2006-10-13 | 37 | 643107  | 6 | 57  | 6 |
| 99  | Eurasia    | 1994-06-29 | 1995-02-23 | 24 | 579396  | 6 | 161 | 5 |
| 100 | Eurasia    | 1997-08-02 | 1998-04-18 | 26 | 960033  | 6 | 105 | 6 |
| 101 | Eurasia    | 1990-08-29 | 1991-03-26 | 21 | 608996  | 6 | 251 | 5 |
| 102 | N. America | 1994-07-29 | 1995-07-23 | 36 | 517837  | 6 | 300 | 4 |
| 103 | Eurasia    | 2006-05-27 | 2007-03-02 | 28 | 1156142 | 6 | 70  | 6 |
| 104 | Eurasia    | 1990-05-31 | 1992-07-18 | 78 | 475838  | 6 | 205 | 5 |
| 105 | N. America | 1999-10-21 | 2000-06-16 | 24 | 1356254 | 6 | 124 | 6 |
| 106 | Eurasia    | 2005-08-30 | 2006-04-06 | 22 | 635484  | 6 | 214 | 5 |
| 107 | Africa     | 2010-11-02 | 2011-10-07 | 34 | 1229554 | 6 | 158 | 5 |
| 108 | S. America | 2009-08-19 | 2010-04-05 | 23 | 2063652 | 6 | 41  | 6 |
| 109 | Eurasia    | 1994-08-08 | 1995-06-03 | 30 | 398127  | 6 | 596 | 3 |
| 110 | Australia  | 1992-01-11 | 1993-01-24 | 38 | 1110576 | 6 | 217 | 5 |
| 111 | Eurasia    | 1995-11-11 | 1996-05-28 | 20 | 1474883 | 6 | 51  | 6 |
| 112 | Eurasia    | 2018-05-24 | 2019-01-08 | 23 | 880543  | 6 | 24  | 7 |
| 113 | N. America | 1990-10-08 | 1991-05-05 | 21 | 975722  | 6 | 174 | 5 |
| 114 | Eurasia    | 2011-10-18 | 2013-01-19 | 46 | 647280  | 6 | 247 | 5 |
| 115 | Africa     | 2008-08-24 | 2010-08-03 | 71 | 824063  | 6 | 262 | 5 |
| 116 | N. America | 1998-09-16 | 1999-03-14 | 18 | 1173875 | 6 | 98  | 6 |
| 117 | Eurasia    | 2019-07-08 | 2020-02-02 | 21 | 1222629 | 6 | 133 | 6 |
| 118 | S. America | 1992-04-20 | 1992-11-05 | 20 | 1619499 | 6 | 106 | 6 |
| 119 | N. America | 1989-07-15 | 1989-12-31 | 17 | 955312  | 6 | 149 | 6 |
| 120 | S. America | 2006-02-06 | 2006-10-03 | 24 | 1117182 | 6 | 92  | 6 |
| 121 | N. America | 1992-01-21 | 1992-10-26 | 28 | 1050044 | 6 | 68  | 6 |
| 122 | N. America | 1997-06-13 | 1998-09-15 | 46 | 333014  | 6 | 216 | 5 |
| 123 | Eurasia    | 2016-09-01 | 2017-05-28 | 27 | 352996  | 6 | 413 | 4 |
| 124 | S. America | 2020-01-14 | 2020-07-11 | 18 | 1371472 | 6 | 171 | 5 |
| 125 | N. America | 1992-11-06 | 1993-07-03 | 24 | 673430  | 6 | 138 | 6 |
| 126 | Eurasia    | 1983-10-25 | 1984-08-09 | 29 | 759220  | 6 | 121 | 6 |
| 127 | Eurasia    | 2013-12-16 | 2014-09-21 | 28 | 642049  | 6 | 237 | 5 |
| 128 | Eurasia    | 1996-10-06 | 1997-04-13 | 19 | 859844  | 6 | 134 | 6 |

|     |            |            |            |    |         |   |     |   |
|-----|------------|------------|------------|----|---------|---|-----|---|
| 129 | Eurasia    | 2003-08-31 | 2004-05-06 | 25 | 930561  | 6 | 103 | 6 |
| 130 | N. America | 2005-06-11 | 2006-04-26 | 32 | 385887  | 6 | 324 | 4 |
| 131 | Eurasia    | 1979-12-25 | 1980-07-01 | 19 | 327086  | 6 | 524 | 3 |
| 132 | Eurasia    | 1995-11-01 | 1996-05-18 | 20 | 729903  | 6 | 218 | 5 |
| 133 | Eurasia    | 1994-08-18 | 1995-06-03 | 29 | 402427  | 6 | 406 | 4 |
| 134 | N. America | 2017-09-16 | 2018-06-12 | 27 | 323281  | 6 | 349 | 4 |
| 135 | Australia  | 2006-05-27 | 2007-04-21 | 33 | 594096  | 6 | 192 | 5 |
| 136 | N. America | 2013-10-07 | 2014-06-03 | 24 | 816763  | 6 | 226 | 5 |
| 137 | N. America | 2006-08-25 | 2007-04-21 | 24 | 550478  | 6 | 169 | 5 |
| 138 | Eurasia    | 2000-08-26 | 2001-03-03 | 19 | 659088  | 6 | 108 | 6 |
| 139 | Australia  | 2021-12-14 | 2022-09-29 | 29 | 597239  | 6 | 119 | 6 |
| 140 | N. America | 1985-08-25 | 1986-04-21 | 24 | 335446  | 6 | 313 | 4 |
| 141 | Australia  | 2004-12-23 | 2005-06-20 | 18 | 1384920 | 6 | 77  | 6 |
| 142 | Eurasia    | 2014-08-13 | 2015-03-20 | 22 | 542051  | 6 | 266 | 5 |
| 143 | Eurasia    | 2013-05-20 | 2013-12-25 | 22 | 309527  | 6 | 377 | 4 |
| 144 | Eurasia    | 2004-09-24 | 2005-05-11 | 23 | 1125069 | 6 | 175 | 5 |
| 145 | Australia  | 2020-03-24 | 2021-01-27 | 31 | 502273  | 6 | 195 | 5 |
| 146 | Eurasia    | 1979-12-25 | 1980-06-01 | 16 | 859657  | 6 | 520 | 3 |
| 147 | Africa     | 2011-05-01 | 2011-10-07 | 16 | 1485609 | 6 | 71  | 6 |
| 148 | Eurasia    | 2014-01-15 | 2014-10-31 | 29 | 542583  | 6 | 343 | 4 |
| 149 | Australia  | 2013-03-01 | 2014-02-13 | 35 | 658238  | 6 | 239 | 5 |
| 150 | Africa     | 1995-03-06 | 1995-12-20 | 29 | 1213001 | 6 | 55  | 6 |
| 151 | N. America | 1999-09-21 | 2000-05-07 | 23 | 404688  | 6 | 373 | 4 |
| 152 | N. America | 1991-08-24 | 1992-05-19 | 27 | 269314  | 6 | 431 | 4 |
| 153 | S. America | 1997-12-30 | 1999-02-12 | 41 | 545781  | 6 | 301 | 4 |
| 154 | N. America | 2015-01-10 | 2015-10-16 | 28 | 628298  | 6 | 173 | 5 |
| 155 | Eurasia    | 1985-07-16 | 1986-03-02 | 23 | 291464  | 6 | 382 | 4 |
| 156 | Eurasia    | 2013-09-07 | 2014-04-14 | 22 | 730971  | 5 | 244 | 5 |
| 157 | Africa     | 1980-03-24 | 1980-09-19 | 18 | 663175  | 5 | 260 | 5 |
| 158 | Eurasia    | 1995-09-22 | 1996-06-07 | 26 | 314342  | 5 | 282 | 4 |
| 159 | Africa     | 2012-03-06 | 2012-08-02 | 15 | 1386651 | 5 | 183 | 5 |
| 160 | S. America | 2017-06-28 | 2017-11-14 | 14 | 1617036 | 5 | 26  | 7 |
| 161 | N. America | 2011-09-08 | 2012-04-04 | 21 | 416090  | 5 | 447 | 4 |
| 162 | Eurasia    | 1990-09-18 | 1991-06-04 | 26 | 356150  | 5 | 374 | 4 |
| 163 | N. America | 1984-08-30 | 1985-03-07 | 19 | 360236  | 5 | 519 | 3 |
| 164 | N. America | 2009-07-10 | 2010-03-06 | 24 | 243963  | 5 | 661 | 2 |
| 165 | N. America | 2010-03-17 | 2010-07-14 | 12 | 1224927 | 5 | 198 | 5 |
| 166 | Eurasia    | 2002-08-26 | 2003-07-11 | 32 | 478424  | 5 | 236 | 5 |
| 167 | Eurasia    | 2005-09-19 | 2006-04-06 | 20 | 455316  | 5 | 245 | 5 |
| 168 | Eurasia    | 1993-07-24 | 1994-07-08 | 35 | 293059  | 5 | 387 | 4 |
| 169 | Eurasia    | 1979-12-25 | 1980-07-11 | 20 | 204126  | 5 | 646 | 2 |
| 170 | Africa     | 1987-05-17 | 1988-07-09 | 42 | 573387  | 5 | 203 | 5 |
| 171 | Eurasia    | 2006-07-06 | 2006-11-22 | 14 | 492848  | 5 | 275 | 4 |
| 172 | Africa     | 2005-04-02 | 2005-09-28 | 18 | 790131  | 5 | 185 | 5 |
| 173 | N. America | 2006-08-15 | 2007-01-01 | 14 | 655640  | 5 | 220 | 5 |

|     |            |            |            |    |         |   |     |   |
|-----|------------|------------|------------|----|---------|---|-----|---|
| 174 | Eurasia    | 2017-03-10 | 2018-10-30 | 60 | 411713  | 5 | 517 | 3 |
| 175 | Eurasia    | 1989-09-23 | 1990-04-10 | 20 | 556266  | 5 | 120 | 6 |
| 176 | N. America | 2015-03-01 | 2015-08-17 | 17 | 741578  | 5 | 35  | 7 |
| 177 | Eurasia    | 1997-07-03 | 1998-01-28 | 21 | 297875  | 5 | 383 | 4 |
| 178 | S. America | 2016-02-04 | 2016-09-20 | 23 | 1060833 | 5 | 177 | 5 |
| 179 | S. America | 1993-01-25 | 1993-12-30 | 34 | 525942  | 5 | 162 | 5 |
| 180 | Eurasia    | 1997-09-11 | 1998-03-09 | 18 | 516363  | 5 | 426 | 4 |
| 181 | Eurasia    | 2000-10-15 | 2001-04-12 | 18 | 471467  | 5 | 465 | 4 |
| 182 | S. America | 2006-04-27 | 2006-09-23 | 15 | 1119820 | 5 | 129 | 6 |
| 183 | Eurasia    | 2002-08-26 | 2003-06-01 | 28 | 229673  | 5 | 584 | 3 |
| 184 | N. America | 1980-08-21 | 1981-04-17 | 24 | 166276  | 5 | 541 | 3 |
| 185 | Eurasia    | 1998-12-15 | 1999-04-23 | 13 | 1095220 | 5 | 122 | 6 |
| 186 | Eurasia    | 2020-08-01 | 2020-12-08 | 13 | 473908  | 5 | 380 | 4 |
| 187 | Eurasia    | 2001-08-21 | 2002-02-06 | 17 | 482731  | 5 | 211 | 5 |
| 188 | Eurasia    | 2007-01-12 | 2007-10-28 | 29 | 485193  | 5 | 253 | 5 |
| 189 | S. America | 1991-11-22 | 1992-02-29 | 10 | 1542179 | 5 | 91  | 6 |
| 190 | Eurasia    | 2012-10-22 | 2013-04-29 | 19 | 855714  | 5 | 166 | 5 |
| 191 | Eurasia    | 1988-08-19 | 1990-03-21 | 58 | 328161  | 5 | 310 | 4 |
| 192 | Africa     | 1981-02-27 | 1982-03-03 | 37 | 456871  | 5 | 141 | 6 |
| 193 | S. America | 1983-04-28 | 1984-01-02 | 25 | 826022  | 5 | 18  | 7 |
| 194 | Australia  | 2015-03-11 | 2015-12-25 | 29 | 575552  | 5 | 429 | 4 |
| 195 | Eurasia    | 2022-03-14 | 2022-08-20 | 16 | 525907  | 5 | 249 | 5 |
| 196 | Eurasia    | 1991-07-05 | 1992-10-06 | 46 | 123248  | 5 | 644 | 2 |
| 197 | N. America | 2013-06-29 | 2013-10-06 | 10 | 1784564 | 5 | 33  | 7 |
| 198 | Africa     | 1998-11-05 | 1999-03-14 | 13 | 997405  | 5 | 72  | 6 |
| 199 | S. America | 1988-03-02 | 1988-06-19 | 11 | 1024210 | 5 | 209 | 5 |
| 200 | Eurasia    | 1992-07-29 | 1993-01-04 | 16 | 892871  | 5 | 131 | 6 |
| 201 | Eurasia    | 2021-07-07 | 2022-06-21 | 35 | 265064  | 5 | 433 | 4 |
| 202 | Africa     | 1982-12-09 | 1983-07-16 | 22 | 547368  | 5 | 145 | 6 |
| 203 | Eurasia    | 1997-04-14 | 1997-12-19 | 25 | 458419  | 5 | 504 | 3 |
| 204 | Eurasia    | 1993-07-04 | 1994-07-08 | 37 | 334907  | 5 | 496 | 4 |
| 205 | N. America | 2006-08-15 | 2007-05-01 | 26 | 185002  | 5 | 445 | 4 |
| 206 | N. America | 2012-06-24 | 2012-11-30 | 16 | 347115  | 5 | 163 | 5 |
| 207 | Eurasia    | 1995-09-02 | 1996-04-28 | 24 | 257213  | 5 | 546 | 3 |
| 208 | Australia  | 2007-02-21 | 2007-08-19 | 18 | 607831  | 5 | 212 | 5 |
| 209 | N. America | 1989-06-25 | 1989-10-12 | 11 | 554876  | 5 | 289 | 4 |
| 210 | Africa     | 2005-02-01 | 2005-11-07 | 28 | 752648  | 5 | 153 | 6 |
| 211 | N. America | 2015-10-07 | 2016-03-14 | 16 | 415815  | 5 | 367 | 4 |
| 212 | S. America | 1983-01-08 | 1983-04-17 | 10 | 1449758 | 5 | 87  | 6 |
| 213 | Eurasia    | 2007-10-29 | 2008-04-15 | 17 | 605411  | 5 | 140 | 6 |
| 214 | Africa     | 2014-06-04 | 2014-09-21 | 11 | 1322322 | 5 | 127 | 6 |
| 215 | Africa     | 2018-10-11 | 2019-01-18 | 10 | 1077215 | 5 | 142 | 6 |
| 216 | Eurasia    | 2022-06-02 | 2022-09-19 | 11 | 728359  | 5 | 81  | 6 |
| 217 | Eurasia    | 1988-07-20 | 1989-01-05 | 17 | 323371  | 5 | 608 | 3 |
| 218 | Eurasia    | 1986-09-29 | 1987-04-06 | 19 | 514887  | 5 | 89  | 6 |

|     |            |            |            |    |         |   |     |   |
|-----|------------|------------|------------|----|---------|---|-----|---|
| 219 | S. America | 1985-11-13 | 1986-02-10 | 9  | 1121509 | 5 | 187 | 5 |
| 220 | Eurasia    | 2019-04-09 | 2019-07-27 | 11 | 860310  | 5 | 204 | 5 |
| 221 | N. America | 2020-08-31 | 2021-03-18 | 20 | 190432  | 5 | 365 | 4 |
| 222 | Eurasia    | 2002-08-06 | 2003-04-12 | 25 | 364236  | 5 | 421 | 4 |
| 223 | Eurasia    | 1996-08-17 | 1996-12-04 | 11 | 725758  | 5 | 151 | 6 |
| 224 | Eurasia    | 2014-04-05 | 2014-10-31 | 21 | 478616  | 5 | 410 | 4 |
| 225 | Eurasia    | 1988-11-07 | 1989-04-05 | 15 | 565232  | 5 | 248 | 5 |
| 226 | N. America | 2003-10-10 | 2004-06-25 | 26 | 164899  | 5 | 579 | 3 |
| 227 | N. America | 2006-09-24 | 2007-07-20 | 30 | 114371  | 5 | 655 | 2 |
| 228 | Eurasia    | 2014-03-16 | 2014-10-01 | 20 | 365360  | 5 | 304 | 4 |
| 229 | Eurasia    | 1982-09-10 | 1983-01-17 | 13 | 462096  | 5 | 372 | 4 |
| 230 | S. America | 2002-09-25 | 2003-01-12 | 11 | 964856  | 5 | 85  | 6 |
| 231 | Eurasia    | 1980-12-29 | 1982-02-21 | 42 | 368713  | 5 | 503 | 4 |
| 232 | Africa     | 2015-12-16 | 2016-04-03 | 11 | 1032710 | 5 | 200 | 5 |
| 233 | Eurasia    | 2022-02-02 | 2022-12-18 | 32 | 292880  | 5 | 672 | 2 |
| 234 | Australia  | 1996-04-19 | 1997-01-13 | 27 | 561973  | 5 | 107 | 6 |
| 235 | Eurasia    | 1995-11-11 | 1996-04-28 | 17 | 187712  | 5 | 455 | 4 |
| 236 | N. America | 2016-09-11 | 2016-12-29 | 11 | 787301  | 5 | 259 | 5 |
| 237 | Africa     | 1997-09-11 | 1998-06-07 | 27 | 721623  | 5 | 314 | 4 |
| 238 | Africa     | 1989-03-17 | 1990-01-20 | 31 | 357246  | 5 | 357 | 4 |
| 239 | Eurasia    | 1985-10-24 | 1986-06-10 | 23 | 512131  | 5 | 312 | 4 |
| 240 | N. America | 1998-02-28 | 1998-08-16 | 17 | 447362  | 5 | 346 | 4 |
| 241 | Africa     | 1986-11-28 | 1987-05-06 | 16 | 619074  | 5 | 355 | 4 |
| 242 | Australia  | 2006-01-17 | 2006-07-05 | 17 | 771828  | 5 | 167 | 5 |
| 243 | S. America | 1998-03-10 | 1998-10-15 | 22 | 426933  | 5 | 457 | 4 |
| 244 | N. America | 2007-09-19 | 2008-01-06 | 11 | 559933  | 5 | 399 | 4 |
| 245 | Australia  | 2002-06-07 | 2003-02-01 | 24 | 583505  | 5 | 234 | 5 |
| 246 | N. America | 2000-10-25 | 2001-04-12 | 17 | 337046  | 5 | 238 | 5 |
| 247 | S. America | 2004-01-18 | 2004-05-06 | 11 | 715374  | 5 | 369 | 4 |
| 248 | S. America | 1983-01-28 | 1983-11-23 | 30 | 403219  | 5 | 337 | 4 |
| 249 | Eurasia    | 1996-11-15 | 1997-03-24 | 13 | 497555  | 5 | 180 | 5 |
| 250 | N. America | 1998-08-07 | 1999-05-23 | 29 | 135490  | 5 | 588 | 3 |
| 251 | Eurasia    | 2007-04-02 | 2007-08-09 | 13 | 509377  | 5 | 184 | 5 |
| 252 | Africa     | 2013-04-10 | 2013-06-28 | 8  | 1256296 | 5 | 379 | 4 |
| 253 | Eurasia    | 2014-11-11 | 2015-04-09 | 15 | 396423  | 5 | 235 | 5 |
| 254 | Eurasia    | 1987-09-14 | 1988-03-31 | 20 | 156351  | 5 | 508 | 3 |
| 255 | Australia  | 1993-02-14 | 1993-07-03 | 14 | 627243  | 5 | 154 | 6 |
| 256 | Eurasia    | 2021-02-17 | 2021-06-16 | 12 | 625932  | 5 | 242 | 5 |
| 257 | S. America | 2017-06-08 | 2017-11-24 | 17 | 609719  | 5 | 233 | 5 |
| 258 | N. America | 1996-09-06 | 1996-12-04 | 9  | 470678  | 5 | 279 | 4 |
| 259 | Australia  | 2002-06-07 | 2003-02-11 | 25 | 326834  | 5 | 223 | 5 |
| 260 | Eurasia    | 2001-10-10 | 2002-04-17 | 19 | 300463  | 5 | 411 | 4 |
| 261 | Eurasia    | 2018-10-11 | 2019-07-27 | 29 | 279454  | 5 | 274 | 4 |
| 262 | N. America | 2007-08-20 | 2008-03-16 | 21 | 135321  | 5 | 677 | 2 |
| 263 | Eurasia    | 2007-11-28 | 2008-03-06 | 10 | 659005  | 5 | 385 | 4 |

|     |            |            |            |    |        |   |     |   |
|-----|------------|------------|------------|----|--------|---|-----|---|
| 264 | S. America | 1997-02-23 | 1997-06-12 | 11 | 556036 | 5 | 368 | 4 |
| 265 | Africa     | 1994-02-19 | 1994-10-16 | 24 | 834022 | 5 | 58  | 6 |
| 266 | S. America | 1989-05-26 | 1989-11-21 | 18 | 326111 | 5 | 551 | 3 |
| 267 | Eurasia    | 2011-11-07 | 2013-04-19 | 53 | 263959 | 5 | 557 | 3 |
| 268 | Eurasia    | 2018-07-23 | 2019-02-17 | 21 | 579987 | 5 | 273 | 4 |
| 269 | Eurasia    | 1979-12-25 | 1980-03-23 | 9  | 671439 | 5 | 408 | 4 |
| 270 | N. America | 2008-09-23 | 2009-03-31 | 19 | 573259 | 5 | 219 | 5 |
| 271 | Africa     | 1982-03-04 | 1982-10-09 | 22 | 522873 | 5 | 336 | 4 |
| 272 | Eurasia    | 2013-10-17 | 2014-04-14 | 18 | 133587 | 4 | 738 | 1 |
| 273 | Eurasia    | 2015-05-10 | 2015-07-28 | 8  | 875214 | 4 | 112 | 6 |
| 274 | Eurasia    | 2008-02-16 | 2008-07-04 | 14 | 402092 | 4 | 341 | 4 |
| 275 | Eurasia    | 2016-10-11 | 2017-01-18 | 10 | 335993 | 4 | 494 | 4 |
| 276 | N. America | 2020-08-11 | 2020-11-28 | 11 | 533988 | 4 | 78  | 6 |
| 277 | Africa     | 1985-03-28 | 1985-11-22 | 24 | 422977 | 4 | 461 | 4 |
| 278 | Eurasia    | 2005-12-28 | 2006-05-26 | 15 | 354834 | 4 | 462 | 4 |
| 279 | Eurasia    | 1993-07-04 | 1993-10-31 | 12 | 339043 | 4 | 287 | 4 |
| 280 | Africa     | 1997-04-04 | 1997-08-31 | 15 | 701432 | 4 | 150 | 6 |
| 281 | Eurasia    | 1995-11-21 | 1996-03-19 | 12 | 475052 | 4 | 272 | 4 |
| 282 | N. America | 1996-02-09 | 1996-07-27 | 17 | 465613 | 4 | 263 | 5 |
| 283 | N. America | 2008-11-22 | 2009-04-10 | 14 | 439706 | 4 | 491 | 4 |
| 284 | S. America | 2019-07-18 | 2019-11-14 | 12 | 597464 | 4 | 135 | 6 |
| 285 | Australia  | 2009-06-10 | 2009-11-16 | 16 | 510998 | 4 | 280 | 4 |
| 286 | N. America | 2019-07-08 | 2019-10-15 | 10 | 606623 | 4 | 306 | 4 |
| 287 | Africa     | 2003-09-20 | 2004-01-17 | 12 | 810205 | 4 | 152 | 6 |
| 288 | Eurasia    | 1990-02-10 | 1991-01-05 | 33 | 369043 | 4 | 559 | 3 |
| 289 | Africa     | 2002-07-07 | 2002-11-03 | 12 | 607311 | 4 | 358 | 4 |
| 290 | Eurasia    | 2016-08-02 | 2016-10-30 | 9  | 610900 | 4 | 364 | 4 |
| 291 | Eurasia    | 2006-06-26 | 2006-09-23 | 9  | 282775 | 4 | 326 | 4 |
| 292 | N. America | 1987-03-18 | 1987-07-15 | 12 | 604997 | 4 | 288 | 4 |
| 293 | Africa     | 1999-12-20 | 2000-03-08 | 8  | 879989 | 4 | 123 | 6 |
| 294 | Eurasia    | 2011-04-21 | 2011-07-09 | 8  | 781956 | 4 | 144 | 6 |
| 295 | Eurasia    | 1982-11-29 | 1983-03-18 | 11 | 490037 | 4 | 381 | 4 |
| 296 | Eurasia    | 1997-06-03 | 1997-12-09 | 19 | 375024 | 4 | 428 | 4 |
| 297 | Eurasia    | 2005-04-12 | 2005-10-08 | 18 | 315546 | 4 | 278 | 4 |
| 298 | Eurasia    | 2013-12-16 | 2014-03-25 | 10 | 529962 | 4 | 286 | 4 |
| 299 | N. America | 1992-07-09 | 1993-01-14 | 19 | 152289 | 4 | 593 | 3 |
| 300 | Africa     | 2021-03-29 | 2021-10-14 | 20 | 262312 | 4 | 338 | 4 |
| 301 | N. America | 1994-06-29 | 1994-10-16 | 11 | 293495 | 4 | 529 | 3 |
| 302 | Eurasia    | 1988-07-20 | 1988-11-26 | 13 | 292140 | 4 | 293 | 4 |
| 303 | Eurasia    | 1997-07-23 | 1997-12-09 | 14 | 516755 | 4 | 298 | 4 |
| 304 | N. America | 1998-06-28 | 1999-01-03 | 19 | 236612 | 4 | 415 | 4 |
| 305 | N. America | 1990-08-29 | 1990-12-16 | 11 | 310729 | 4 | 430 | 4 |
| 306 | Eurasia    | 2007-11-18 | 2008-05-05 | 17 | 252275 | 4 | 729 | 2 |
| 307 | Eurasia    | 1985-10-04 | 1986-05-21 | 23 | 296889 | 4 | 418 | 4 |
| 308 | Eurasia    | 1999-09-11 | 2000-03-28 | 20 | 307258 | 4 | 268 | 5 |

|     |            |            |            |    |         |   |     |   |
|-----|------------|------------|------------|----|---------|---|-----|---|
| 309 | Eurasia    | 2018-01-14 | 2018-06-22 | 16 | 495269  | 4 | 117 | 6 |
| 310 | Eurasia    | 2019-10-06 | 2020-01-23 | 11 | 390686  | 4 | 232 | 5 |
| 311 | Eurasia    | 2018-11-20 | 2019-03-09 | 11 | 225918  | 4 | 558 | 3 |
| 312 | Africa     | 1993-08-03 | 1994-07-08 | 34 | 350590  | 4 | 435 | 4 |
| 313 | Eurasia    | 1996-06-08 | 1996-09-15 | 10 | 437916  | 4 | 231 | 5 |
| 314 | N. America | 2010-01-16 | 2010-07-14 | 18 | 278778  | 4 | 452 | 4 |
| 315 | Eurasia    | 2019-07-08 | 2019-11-04 | 12 | 469988  | 4 | 257 | 5 |
| 316 | Eurasia    | 2000-12-24 | 2001-04-02 | 10 | 393699  | 4 | 480 | 4 |
| 317 | N. America | 1988-10-08 | 1989-04-15 | 19 | 227412  | 4 | 567 | 3 |
| 318 | S. America | 1980-02-03 | 1980-04-12 | 7  | 747344  | 4 | 194 | 5 |
| 319 | Eurasia    | 2017-06-18 | 2017-08-26 | 7  | 712356  | 4 | 325 | 4 |
| 320 | S. America | 2003-05-13 | 2003-09-29 | 14 | 432132  | 4 | 228 | 5 |
| 321 | Africa     | 2010-09-23 | 2010-12-11 | 8  | 1054508 | 4 | 243 | 5 |
| 322 | Australia  | 2006-08-25 | 2007-01-11 | 14 | 704787  | 4 | 202 | 5 |
| 323 | Eurasia    | 1985-10-04 | 1986-01-11 | 10 | 355342  | 4 | 458 | 4 |
| 324 | Eurasia    | 2022-08-31 | 2022-12-28 | 12 | 287325  | 4 | 563 | 3 |
| 325 | Eurasia    | 2005-09-29 | 2006-07-25 | 30 | 286775  | 4 | 652 | 2 |
| 326 | Africa     | 2013-06-29 | 2013-10-06 | 10 | 315286  | 4 | 296 | 4 |
| 327 | N. America | 2010-06-15 | 2010-09-02 | 8  | 502322  | 4 | 213 | 5 |
| 328 | Australia  | 1982-12-29 | 1983-03-08 | 7  | 768607  | 4 | 409 | 4 |
| 329 | Eurasia    | 2010-10-03 | 2011-01-30 | 12 | 420200  | 4 | 227 | 5 |
| 330 | N. America | 2010-01-26 | 2010-05-15 | 11 | 403928  | 4 | 394 | 4 |
| 331 | Africa     | 1994-12-06 | 1995-02-23 | 8  | 895045  | 4 | 32  | 7 |
| 332 | Eurasia    | 1998-01-09 | 1998-05-18 | 13 | 371819  | 4 | 464 | 4 |
| 333 | Africa     | 2007-05-12 | 2007-07-30 | 8  | 643163  | 4 | 164 | 5 |
| 334 | N. America | 1997-07-23 | 1997-11-09 | 11 | 240819  | 4 | 444 | 4 |
| 335 | S. America | 1981-04-08 | 1981-09-24 | 17 | 637366  | 4 | 80  | 6 |
| 336 | Eurasia    | 1995-11-21 | 1996-03-19 | 12 | 453570  | 4 | 224 | 5 |
| 337 | Eurasia    | 2008-04-26 | 2008-12-31 | 25 | 283441  | 4 | 371 | 4 |
| 338 | N. America | 1985-06-16 | 1985-10-13 | 12 | 294544  | 4 | 497 | 4 |
| 339 | Africa     | 1984-03-03 | 1984-11-07 | 25 | 311689  | 4 | 516 | 3 |
| 340 | N. America | 1982-10-10 | 1983-03-08 | 15 | 167323  | 4 | 733 | 2 |
| 341 | Eurasia    | 1989-09-23 | 1990-01-30 | 13 | 192095  | 4 | 498 | 4 |
| 342 | N. America | 2008-10-03 | 2009-01-20 | 11 | 301600  | 4 | 283 | 4 |
| 343 | Eurasia    | 2007-12-28 | 2008-03-26 | 9  | 568236  | 4 | 201 | 5 |
| 344 | Eurasia    | 2014-05-15 | 2014-08-22 | 10 | 389639  | 4 | 687 | 2 |
| 345 | Eurasia    | 1981-10-15 | 1981-12-23 | 7  | 515760  | 4 | 506 | 3 |
| 346 | Eurasia    | 1999-01-04 | 1999-05-03 | 12 | 380358  | 4 | 320 | 4 |
| 347 | Africa     | 1986-07-11 | 1986-11-17 | 13 | 521699  | 4 | 328 | 4 |
| 348 | Australia  | 1991-08-24 | 1992-03-10 | 20 | 320627  | 4 | 427 | 4 |
| 349 | S. America | 2004-01-18 | 2004-03-07 | 5  | 1080564 | 4 | 332 | 4 |
| 350 | Australia  | 1996-01-10 | 1996-04-08 | 9  | 764676  | 4 | 206 | 5 |
| 351 | Eurasia    | 1997-07-03 | 1997-10-10 | 10 | 282464  | 4 | 472 | 4 |
| 352 | Eurasia    | 2009-01-11 | 2009-03-31 | 8  | 629539  | 4 | 553 | 3 |
| 353 | N. America | 1994-06-09 | 1994-09-06 | 9  | 547969  | 4 | 329 | 4 |



|     |            |            |            |    |        |   |     |   |
|-----|------------|------------|------------|----|--------|---|-----|---|
| 354 | Africa     | 2002-10-25 | 2003-06-21 | 24 | 349848 | 4 | 656 | 2 |
| 355 | Africa     | 2016-09-21 | 2017-03-19 | 18 | 257601 | 4 | 659 | 2 |
| 356 | N. America | 2004-09-24 | 2005-01-21 | 12 | 226979 | 4 | 694 | 2 |
| 357 | Eurasia    | 1995-07-04 | 1995-11-10 | 13 | 287016 | 4 | 478 | 4 |
| 358 | Eurasia    | 2006-04-17 | 2007-03-12 | 33 | 239145 | 4 | 649 | 2 |
| 359 | Africa     | 2005-01-12 | 2005-09-28 | 26 | 288321 | 4 | 587 | 3 |
| 360 | Eurasia    | 2005-08-30 | 2006-02-05 | 16 | 144708 | 4 | 565 | 3 |
| 361 | Eurasia    | 2011-10-18 | 2012-04-04 | 17 | 173303 | 4 | 715 | 2 |
| 362 | S. America | 2013-04-30 | 2013-11-25 | 21 | 306055 | 4 | 354 | 4 |
| 363 | Australia  | 2016-02-14 | 2016-07-12 | 15 | 591131 | 4 | 222 | 5 |
| 364 | Eurasia    | 1999-10-01 | 2000-05-07 | 22 | 228667 | 4 | 542 | 3 |
| 365 | S. America | 1990-10-08 | 1991-04-05 | 18 | 282133 | 4 | 252 | 5 |
| 366 | Africa     | 1986-08-10 | 1987-05-26 | 29 | 289075 | 4 | 684 | 2 |
| 367 | Australia  | 1982-07-12 | 1982-12-28 | 17 | 288595 | 4 | 347 | 4 |
| 368 | Eurasia    | 2016-07-03 | 2016-08-31 | 6  | 571966 | 4 | 307 | 4 |
| 369 | Africa     | 2014-06-24 | 2014-09-01 | 7  | 624338 | 4 | 215 | 5 |
| 370 | Eurasia    | 1992-07-29 | 1992-10-16 | 8  | 423618 | 4 | 467 | 4 |
| 371 | Eurasia    | 2010-09-13 | 2011-01-10 | 12 | 137146 | 4 | 523 | 3 |
| 372 | Eurasia    | 1980-12-09 | 1981-03-18 | 10 | 374170 | 4 | 573 | 3 |
| 373 | S. America | 1983-04-18 | 1984-01-02 | 26 | 337319 | 4 | 342 | 4 |
| 374 | N. America | 1983-11-24 | 1984-03-22 | 12 | 191872 | 4 | 575 | 3 |
| 375 | N. America | 1998-04-29 | 1998-07-27 | 9  | 461224 | 4 | 207 | 5 |
| 376 | Eurasia    | 1984-10-29 | 1985-06-05 | 22 | 358927 | 4 | 309 | 4 |
| 377 | Eurasia    | 1982-09-20 | 1983-02-16 | 15 | 469441 | 4 | 250 | 5 |
| 378 | N. America | 2012-03-06 | 2012-07-23 | 14 | 190863 | 4 | 466 | 4 |
| 379 | N. America | 2013-06-29 | 2014-05-14 | 32 | 228928 | 4 | 566 | 3 |
| 380 | N. America | 1989-11-02 | 1990-02-19 | 11 | 403935 | 4 | 303 | 4 |
| 381 | N. America | 2007-09-09 | 2008-01-26 | 14 | 138379 | 4 | 706 | 2 |
| 382 | Eurasia    | 1980-08-21 | 1980-10-29 | 7  | 203893 | 4 | 434 | 4 |
| 383 | N. America | 2019-09-06 | 2020-01-03 | 12 | 177983 | 4 | 701 | 2 |
| 384 | Australia  | 2022-10-10 | 2022-12-28 | 8  | 422108 | 4 | 395 | 4 |
| 385 | Eurasia    | 2022-07-02 | 2022-09-09 | 7  | 501712 | 4 | 318 | 4 |
| 386 | Australia  | 1982-10-10 | 1983-02-26 | 14 | 399812 | 4 | 258 | 5 |
| 387 | Eurasia    | 1993-01-05 | 1993-03-25 | 8  | 451265 | 4 | 479 | 4 |
| 388 | N. America | 2009-08-29 | 2009-12-06 | 10 | 291896 | 4 | 486 | 4 |
| 389 | Africa     | 1981-11-14 | 1982-03-03 | 11 | 399830 | 4 | 396 | 4 |
| 390 | S. America | 2011-11-17 | 2012-02-04 | 8  | 462072 | 4 | 308 | 4 |
| 391 | Eurasia    | 1988-06-20 | 1988-09-17 | 9  | 234867 | 4 | 554 | 3 |
| 392 | N. America | 1979-12-25 | 1980-04-22 | 12 | 112970 | 4 | 734 | 2 |
| 393 | Africa     | 2003-03-14 | 2003-10-19 | 22 | 307231 | 4 | 492 | 4 |
| 394 | N. America | 2011-04-21 | 2011-08-18 | 12 | 262834 | 4 | 440 | 4 |
| 395 | Eurasia    | 1981-09-25 | 1982-02-21 | 15 | 195366 | 4 | 597 | 3 |
| 396 | Eurasia    | 2001-07-12 | 2001-09-29 | 8  | 268184 | 4 | 532 | 3 |
| 397 | Africa     | 2014-11-01 | 2015-07-08 | 25 | 292854 | 4 | 683 | 2 |
| 398 | Eurasia    | 2010-10-03 | 2011-03-31 | 18 | 82458  | 4 | 717 | 2 |

|     |            |            |            |    |        |   |     |   |
|-----|------------|------------|------------|----|--------|---|-----|---|
| 399 | Eurasia    | 1999-12-20 | 2000-06-16 | 18 | 257985 | 4 | 742 | 1 |
| 400 | Eurasia    | 1992-01-01 | 1992-03-30 | 9  | 315729 | 4 | 678 | 2 |
| 401 | N. America | 1998-10-06 | 1999-04-13 | 19 | 150819 | 4 | 572 | 3 |
| 402 | N. America | 1989-11-12 | 1990-01-20 | 7  | 521136 | 4 | 344 | 4 |
| 403 | S. America | 1989-12-02 | 1990-01-20 | 5  | 801913 | 4 | 156 | 5 |
| 404 | N. America | 2006-06-06 | 2006-08-04 | 6  | 520909 | 4 | 359 | 4 |
| 405 | Eurasia    | 2021-03-29 | 2021-07-06 | 10 | 134316 | 4 | 641 | 2 |
| 406 | Eurasia    | 2012-10-22 | 2013-04-19 | 18 | 301424 | 4 | 591 | 3 |
| 407 | Australia  | 1999-03-25 | 1999-11-09 | 23 | 295724 | 4 | 495 | 4 |
| 408 | Eurasia    | 2021-05-18 | 2022-01-02 | 23 | 163313 | 4 | 769 | 1 |
| 409 | N. America | 1995-08-03 | 1995-10-21 | 8  | 381990 | 4 | 459 | 4 |
| 410 | N. America | 1989-06-05 | 1989-09-02 | 9  | 272082 | 4 | 366 | 4 |
| 411 | S. America | 1995-05-15 | 1995-10-01 | 14 | 273354 | 4 | 500 | 4 |
| 412 | N. America | 2021-01-08 | 2021-06-16 | 16 | 182856 | 4 | 476 | 4 |
| 413 | Eurasia    | 1980-08-11 | 1980-11-18 | 10 | 224331 | 4 | 592 | 3 |
| 414 | S. America | 1980-02-13 | 1980-03-23 | 4  | 784058 | 4 | 115 | 6 |
| 415 | Eurasia    | 2020-08-31 | 2020-11-28 | 9  | 172050 | 4 | 625 | 2 |
| 416 | S. America | 2018-02-03 | 2018-04-13 | 7  | 474461 | 4 | 370 | 4 |
| 417 | Eurasia    | 2022-01-13 | 2022-07-01 | 17 | 194570 | 4 | 770 | 1 |
| 418 | Eurasia    | 2000-12-24 | 2001-04-22 | 12 | 186934 | 4 | 669 | 2 |
| 419 | Eurasia    | 1990-08-29 | 1991-01-15 | 14 | 115672 | 4 | 741 | 1 |
| 420 | Eurasia    | 2001-09-20 | 2002-02-06 | 14 | 99614  | 4 | 693 | 2 |
| 421 | S. America | 1996-05-19 | 1996-10-05 | 14 | 243168 | 4 | 451 | 4 |
| 422 | Eurasia    | 2015-09-07 | 2015-11-15 | 7  | 562890 | 4 | 386 | 4 |
| 423 | Eurasia    | 1997-08-22 | 1997-12-29 | 13 | 337773 | 4 | 398 | 4 |
| 424 | Australia  | 2014-06-04 | 2014-12-10 | 19 | 275355 | 4 | 628 | 2 |
| 425 | Africa     | 2014-01-15 | 2014-09-21 | 25 | 217544 | 4 | 713 | 2 |
| 426 | Eurasia    | 1982-12-19 | 1983-06-26 | 19 | 296663 | 4 | 720 | 2 |
| 427 | N. America | 1986-03-23 | 1986-05-21 | 6  | 605833 | 4 | 188 | 5 |
| 428 | Eurasia    | 2021-06-07 | 2021-08-05 | 6  | 302204 | 4 | 390 | 4 |
| 429 | Africa     | 1996-08-07 | 1997-03-24 | 23 | 280391 | 4 | 501 | 4 |
| 430 | Africa     | 1992-11-16 | 1993-01-24 | 7  | 514078 | 4 | 570 | 3 |
| 431 | Eurasia    | 2002-10-05 | 2003-05-22 | 23 | 90557  | 4 | 605 | 3 |
| 432 | Africa     | 1983-03-19 | 1983-10-24 | 22 | 311619 | 4 | 276 | 4 |
| 433 | Australia  | 1988-06-10 | 1988-11-06 | 15 | 244925 | 4 | 518 | 3 |
| 434 | Eurasia    | 1983-11-24 | 1984-03-22 | 12 | 320604 | 4 | 540 | 3 |
| 435 | Eurasia    | 2004-05-27 | 2004-08-14 | 8  | 329988 | 4 | 281 | 4 |
| 436 | Africa     | 2002-07-07 | 2002-09-14 | 7  | 478083 | 4 | 351 | 4 |
| 437 | Africa     | 1983-02-27 | 1983-06-26 | 12 | 401560 | 4 | 442 | 4 |
| 438 | Eurasia    | 2018-07-23 | 2018-10-10 | 8  | 194007 | 4 | 499 | 4 |
| 439 | N. America | 2005-07-11 | 2005-09-28 | 8  | 293947 | 4 | 510 | 3 |
| 440 | S. America | 2014-12-31 | 2015-02-18 | 5  | 700636 | 4 | 327 | 4 |
| 441 | N. America | 2001-07-12 | 2001-12-08 | 15 | 264853 | 4 | 295 | 4 |
| 442 | Eurasia    | 1996-01-30 | 1996-06-27 | 15 | 246959 | 4 | 468 | 4 |
| 443 | Africa     | 2006-11-13 | 2007-05-01 | 17 | 179554 | 4 | 581 | 3 |

|     |            |            |            |    |        |   |     |   |
|-----|------------|------------|------------|----|--------|---|-----|---|
| 444 | Africa     | 2015-10-07 | 2016-01-14 | 10 | 329010 | 4 | 638 | 2 |
| 445 | N. America | 2006-04-27 | 2006-08-24 | 12 | 321278 | 4 | 168 | 5 |
| 446 | N. America | 2016-08-02 | 2016-12-09 | 13 | 104375 | 4 | 705 | 2 |
| 447 | Eurasia    | 2001-07-02 | 2001-08-20 | 5  | 240395 | 4 | 658 | 2 |
| 448 | Eurasia    | 2001-09-30 | 2002-02-16 | 14 | 112417 | 4 | 633 | 2 |
| 449 | N. America | 2017-10-06 | 2018-01-13 | 10 | 209644 | 4 | 539 | 3 |
| 450 | Eurasia    | 2010-05-26 | 2010-08-23 | 9  | 225728 | 4 | 356 | 4 |
| 451 | N. America | 2009-11-07 | 2010-01-25 | 8  | 361252 | 4 | 484 | 4 |
| 452 | Eurasia    | 2005-11-28 | 2006-02-05 | 7  | 393175 | 4 | 360 | 4 |
| 453 | N. America | 1980-08-21 | 1981-01-17 | 15 | 92026  | 4 | 603 | 3 |
| 454 | N. America | 2016-05-24 | 2016-09-30 | 13 | 112816 | 4 | 606 | 3 |
| 455 | Africa     | 1987-10-24 | 1988-07-09 | 26 | 194974 | 4 | 650 | 2 |
| 456 | Eurasia    | 1999-10-11 | 2000-01-08 | 9  | 309319 | 4 | 401 | 4 |
| 457 | Eurasia    | 1992-10-17 | 1992-12-25 | 7  | 232209 | 4 | 569 | 3 |
| 458 | S. America | 1985-03-18 | 1985-05-06 | 5  | 562713 | 4 | 736 | 2 |
| 459 | N. America | 2002-07-27 | 2002-10-04 | 7  | 247231 | 4 | 617 | 3 |
| 460 | Eurasia    | 2009-06-10 | 2009-08-28 | 8  | 444238 | 4 | 165 | 5 |
| 461 | N. America | 1998-04-09 | 1998-06-17 | 7  | 493417 | 4 | 45  | 6 |
| 462 | Australia  | 1994-06-19 | 1994-10-26 | 13 | 313714 | 4 | 514 | 3 |
| 463 | N. America | 2017-08-17 | 2017-11-14 | 9  | 151353 | 4 | 473 | 4 |
| 464 | S. America | 2021-12-04 | 2022-02-21 | 8  | 368255 | 4 | 449 | 4 |
| 465 | Africa     | 2001-08-21 | 2001-11-08 | 8  | 541236 | 4 | 423 | 4 |
| 466 | Australia  | 1986-08-10 | 1987-01-16 | 16 | 277609 | 4 | 647 | 2 |
| 467 | Eurasia    | 2012-06-14 | 2012-09-01 | 8  | 326381 | 4 | 264 | 5 |
| 468 | Eurasia    | 1995-11-11 | 1996-03-29 | 14 | 171950 | 4 | 681 | 2 |
| 469 | N. America | 1980-06-12 | 1980-08-10 | 6  | 541364 | 4 | 143 | 6 |
| 470 | Africa     | 1993-11-11 | 1994-03-20 | 13 | 362221 | 4 | 585 | 3 |
| 471 | Eurasia    | 2020-07-12 | 2020-09-29 | 8  | 287028 | 4 | 698 | 2 |
| 472 | Africa     | 1989-11-02 | 1989-12-31 | 6  | 509501 | 4 | 456 | 4 |
| 473 | Eurasia    | 1992-06-09 | 1992-08-07 | 6  | 661912 | 4 | 116 | 6 |
| 474 | S. America | 2009-05-01 | 2009-06-29 | 6  | 640657 | 4 | 59  | 6 |
| 475 | Australia  | 2016-07-23 | 2016-12-19 | 15 | 386424 | 4 | 477 | 4 |
| 476 | N. America | 2000-08-26 | 2000-11-03 | 7  | 401849 | 4 | 321 | 4 |
| 477 | Eurasia    | 1981-08-26 | 1982-01-12 | 14 | 134873 | 4 | 708 | 2 |
| 478 | Eurasia    | 2019-06-18 | 2019-08-26 | 7  | 556003 | 4 | 330 | 4 |
| 479 | Africa     | 2008-09-03 | 2008-10-22 | 5  | 557695 | 4 | 568 | 3 |
| 480 | Eurasia    | 2001-09-20 | 2002-01-27 | 13 | 169803 | 4 | 528 | 3 |
| 481 | Africa     | 1994-12-16 | 1995-02-13 | 6  | 498872 | 4 | 391 | 4 |
| 482 | S. America | 2015-10-07 | 2015-12-25 | 8  | 396034 | 4 | 489 | 4 |
| 483 | Africa     | 2001-09-30 | 2002-01-07 | 10 | 515649 | 4 | 404 | 4 |
| 484 | N. America | 2009-08-19 | 2009-12-06 | 11 | 156452 | 4 | 657 | 2 |
| 485 | N. America | 2013-07-19 | 2013-10-06 | 8  | 208456 | 4 | 378 | 4 |
| 486 | Eurasia    | 2005-11-28 | 2006-02-15 | 8  | 286319 | 4 | 425 | 4 |
| 487 | Eurasia    | 1990-08-09 | 1990-12-06 | 12 | 226556 | 4 | 490 | 4 |
| 488 | Eurasia    | 2017-10-26 | 2018-01-03 | 7  | 396881 | 4 | 513 | 3 |

|     |            |            |            |    |         |   |     |   |
|-----|------------|------------|------------|----|---------|---|-----|---|
| 489 | Eurasia    | 2000-12-04 | 2001-05-12 | 16 | 77114   | 4 | 756 | 1 |
| 490 | S. America | 2013-04-20 | 2013-05-29 | 4  | 1248746 | 4 | 196 | 5 |
| 491 | Eurasia    | 1981-04-18 | 1982-01-22 | 28 | 167258  | 4 | 746 | 1 |
| 492 | N. America | 2011-05-21 | 2011-09-17 | 12 | 207136  | 4 | 481 | 4 |
| 493 | Australia  | 2017-12-05 | 2018-02-22 | 8  | 437492  | 4 | 316 | 4 |
| 494 | N. America | 2015-05-30 | 2015-08-27 | 9  | 252457  | 4 | 284 | 4 |
| 495 | Eurasia    | 2006-06-16 | 2006-08-24 | 7  | 261326  | 4 | 543 | 3 |
| 496 | Eurasia    | 2021-10-05 | 2022-01-22 | 11 | 235154  | 4 | 545 | 3 |
| 497 | S. America | 2006-01-17 | 2006-02-05 | 2  | 1118534 | 4 | 621 | 2 |
| 498 | Eurasia    | 1996-06-08 | 1996-08-26 | 8  | 264392  | 4 | 261 | 5 |
| 499 | Africa     | 2013-01-30 | 2013-11-15 | 29 | 156828  | 4 | 764 | 1 |
| 500 | Eurasia    | 1990-01-11 | 1990-04-20 | 10 | 220102  | 4 | 679 | 2 |
| 501 | Eurasia    | 1999-09-11 | 2000-03-08 | 18 | 86887   | 4 | 582 | 3 |
| 502 | Eurasia    | 1979-12-25 | 1980-03-13 | 8  | 431503  | 4 | 469 | 4 |
| 503 | N. America | 1980-05-03 | 1980-07-11 | 7  | 328654  | 4 | 412 | 4 |
| 504 | N. America | 2000-12-04 | 2001-02-21 | 8  | 354035  | 4 | 544 | 3 |
| 505 | Africa     | 1983-01-28 | 1983-06-06 | 13 | 241593  | 3 | 537 | 3 |
| 506 | N. America | 2012-01-16 | 2012-05-04 | 11 | 307351  | 3 | 392 | 4 |
| 507 | Eurasia    | 1990-07-20 | 1990-11-26 | 13 | 140794  | 3 | 670 | 2 |
| 508 | S. America | 1980-04-23 | 1980-08-20 | 12 | 262837  | 3 | 600 | 3 |
| 509 | Eurasia    | 2000-02-28 | 2000-09-24 | 21 | 181429  | 3 | 629 | 2 |
| 510 | Eurasia    | 1995-03-26 | 1995-06-23 | 9  | 251653  | 3 | 711 | 2 |
| 511 | Eurasia    | 1992-10-27 | 1993-03-25 | 15 | 329879  | 3 | 340 | 4 |
| 512 | Eurasia    | 1982-07-02 | 1982-08-20 | 5  | 478507  | 3 | 622 | 2 |
| 513 | Eurasia    | 2021-03-19 | 2021-05-17 | 6  | 429138  | 3 | 437 | 4 |
| 514 | S. America | 2007-02-01 | 2007-03-12 | 4  | 654860  | 3 | 104 | 6 |
| 515 | Eurasia    | 2016-11-10 | 2017-04-08 | 15 | 214532  | 3 | 620 | 3 |
| 516 | Eurasia    | 2020-12-09 | 2021-02-26 | 8  | 219438  | 3 | 643 | 2 |
| 517 | S. America | 2011-05-21 | 2011-08-08 | 8  | 258308  | 3 | 682 | 2 |
| 518 | Eurasia    | 2005-12-08 | 2006-03-17 | 10 | 80676   | 3 | 740 | 1 |
| 519 | Africa     | 2006-04-07 | 2006-11-02 | 21 | 158459  | 3 | 668 | 2 |
| 520 | Africa     | 1983-06-27 | 1983-11-23 | 15 | 243971  | 3 | 525 | 3 |
| 521 | N. America | 1996-06-18 | 1996-08-26 | 7  | 222755  | 3 | 448 | 4 |
| 522 | Eurasia    | 2022-08-31 | 2022-12-18 | 11 | 168392  | 3 | 671 | 2 |
| 523 | N. America | 2013-06-19 | 2013-09-06 | 8  | 195625  | 3 | 639 | 2 |
| 524 | N. America | 1988-05-21 | 1988-07-19 | 6  | 591619  | 3 | 460 | 4 |
| 525 | N. America | 1988-09-28 | 1989-02-04 | 13 | 154926  | 3 | 595 | 3 |
| 526 | S. America | 1980-05-13 | 1980-08-20 | 10 | 438817  | 3 | 317 | 4 |
| 527 | Eurasia    | 2001-11-09 | 2002-04-17 | 16 | 176262  | 3 | 562 | 3 |
| 528 | Eurasia    | 2006-07-16 | 2006-11-12 | 12 | 139804  | 3 | 611 | 3 |
| 529 | Eurasia    | 1981-08-16 | 1981-11-13 | 9  | 123800  | 3 | 721 | 2 |
| 530 | S. America | 2003-01-23 | 2003-04-22 | 9  | 503540  | 3 | 246 | 5 |
| 531 | Eurasia    | 2012-02-25 | 2012-10-01 | 22 | 199662  | 3 | 691 | 2 |
| 532 | N. America | 2017-08-27 | 2017-11-24 | 9  | 123842  | 3 | 752 | 1 |
| 533 | Africa     | 1983-10-05 | 1984-05-21 | 23 | 179878  | 3 | 753 | 1 |

|     |            |            |            |    |        |   |     |   |
|-----|------------|------------|------------|----|--------|---|-----|---|
| 534 | Eurasia    | 1995-09-12 | 1995-11-10 | 6  | 304212 | 3 | 362 | 4 |
| 535 | Eurasia    | 1990-07-30 | 1990-10-27 | 9  | 223916 | 3 | 673 | 2 |
| 536 | Australia  | 2003-10-10 | 2003-11-28 | 5  | 662016 | 3 | 333 | 4 |
| 537 | Eurasia    | 1985-11-23 | 1986-04-01 | 13 | 107419 | 3 | 749 | 1 |
| 538 | S. America | 1997-06-03 | 1997-08-01 | 6  | 703554 | 3 | 515 | 3 |
| 539 | S. America | 1979-12-25 | 1980-03-13 | 8  | 370879 | 3 | 189 | 5 |
| 540 | N. America | 1989-06-15 | 1989-08-13 | 6  | 324836 | 3 | 65  | 6 |
| 541 | Eurasia    | 2021-02-27 | 2021-06-16 | 11 | 73940  | 3 | 761 | 1 |
| 542 | N. America | 2003-05-13 | 2003-07-11 | 6  | 399337 | 3 | 353 | 4 |
| 543 | Eurasia    | 2014-07-14 | 2014-09-21 | 7  | 362879 | 3 | 438 | 4 |
| 544 | N. America | 1982-09-20 | 1983-04-17 | 21 | 72121  | 3 | 718 | 2 |
| 545 | Eurasia    | 2006-07-06 | 2006-09-03 | 6  | 246877 | 3 | 56  | 6 |
| 546 | Eurasia    | 2007-07-11 | 2007-08-19 | 4  | 603445 | 3 | 388 | 4 |
| 547 | Africa     | 2013-12-26 | 2014-03-05 | 7  | 549536 | 3 | 38  | 7 |
| 548 | N. America | 2003-08-01 | 2003-10-09 | 7  | 237893 | 3 | 323 | 4 |
| 549 | Africa     | 2001-10-20 | 2001-12-18 | 6  | 413205 | 3 | 454 | 4 |
| 550 | Africa     | 1989-11-22 | 1990-01-20 | 6  | 554209 | 3 | 61  | 6 |
| 551 | Africa     | 2005-02-11 | 2005-03-22 | 4  | 596942 | 3 | 482 | 4 |
| 552 | N. America | 1983-10-15 | 1984-02-11 | 12 | 116243 | 3 | 737 | 1 |
| 553 | Eurasia    | 2022-06-22 | 2022-09-09 | 8  | 176847 | 3 | 534 | 3 |
| 554 | Africa     | 1994-12-16 | 1995-03-15 | 9  | 336633 | 3 | 530 | 3 |
| 555 | Eurasia    | 2002-09-05 | 2002-11-23 | 8  | 166855 | 3 | 630 | 2 |
| 556 | Eurasia    | 1982-08-31 | 1982-12-08 | 10 | 332966 | 3 | 688 | 2 |
| 557 | S. America | 2019-02-28 | 2019-05-08 | 7  | 498107 | 3 | 384 | 4 |
| 558 | Eurasia    | 1981-10-05 | 1981-12-13 | 7  | 416885 | 3 | 302 | 4 |
| 559 | Eurasia    | 1990-11-07 | 1991-01-25 | 8  | 292479 | 3 | 509 | 3 |
| 560 | N. America | 1981-08-16 | 1981-10-14 | 6  | 215159 | 3 | 719 | 2 |
| 561 | N. America | 2020-07-02 | 2020-09-19 | 8  | 173954 | 3 | 578 | 3 |
| 562 | N. America | 1980-11-29 | 1981-04-17 | 14 | 128055 | 3 | 675 | 2 |
| 563 | Africa     | 1987-12-03 | 1988-06-19 | 20 | 172493 | 3 | 766 | 1 |
| 564 | S. America | 1992-03-21 | 1992-08-17 | 15 | 234885 | 3 | 739 | 1 |
| 565 | N. America | 1995-08-13 | 1995-11-30 | 11 | 118621 | 3 | 696 | 2 |
| 566 | N. America | 2019-09-06 | 2019-10-15 | 4  | 727836 | 3 | 446 | 4 |
| 567 | Eurasia    | 2007-11-18 | 2008-02-25 | 10 | 143976 | 3 | 645 | 2 |
| 568 | N. America | 1995-05-05 | 1995-07-03 | 6  | 273985 | 3 | 487 | 4 |
| 569 | Australia  | 1986-11-08 | 1987-01-26 | 8  | 380811 | 3 | 27  | 7 |
| 570 | N. America | 1982-07-02 | 1982-09-09 | 7  | 204754 | 3 | 417 | 4 |
| 571 | S. America | 2005-01-22 | 2005-04-01 | 7  | 438367 | 3 | 291 | 4 |
| 572 | Eurasia    | 1983-02-17 | 1983-05-07 | 8  | 322591 | 3 | 577 | 3 |
| 573 | N. America | 2015-02-09 | 2015-04-19 | 7  | 368413 | 3 | 277 | 4 |
| 574 | Africa     | 2015-12-16 | 2016-02-23 | 7  | 392452 | 3 | 176 | 5 |
| 575 | N. America | 2021-09-15 | 2021-12-03 | 8  | 200810 | 3 | 724 | 2 |
| 576 | S. America | 2019-08-17 | 2019-10-15 | 6  | 404986 | 3 | 535 | 3 |
| 577 | Eurasia    | 1986-05-22 | 1986-06-20 | 3  | 643894 | 3 | 441 | 4 |
| 578 | Eurasia    | 2005-05-12 | 2005-07-30 | 8  | 220591 | 3 | 285 | 4 |

|     |            |            |            |    |        |   |     |   |
|-----|------------|------------|------------|----|--------|---|-----|---|
| 579 | Eurasia    | 2021-06-17 | 2021-08-25 | 7  | 127348 | 3 | 439 | 4 |
| 580 | Eurasia    | 1995-09-22 | 1996-01-19 | 12 | 229096 | 3 | 407 | 4 |
| 581 | Africa     | 1983-10-05 | 1984-02-01 | 12 | 356146 | 3 | 690 | 2 |
| 582 | N. America | 1985-10-24 | 1986-01-11 | 8  | 196106 | 3 | 526 | 3 |
| 583 | Eurasia    | 2014-10-12 | 2015-03-30 | 17 | 142654 | 3 | 716 | 2 |
| 584 | N. America | 2010-10-13 | 2011-01-10 | 9  | 163722 | 3 | 634 | 2 |
| 585 | Africa     | 2017-04-19 | 2017-09-25 | 16 | 197082 | 3 | 552 | 3 |
| 586 | Eurasia    | 2006-08-15 | 2006-11-12 | 9  | 116220 | 3 | 744 | 1 |
| 587 | N. America | 2007-06-21 | 2007-08-29 | 7  | 256852 | 3 | 610 | 3 |
| 588 | Eurasia    | 2013-07-09 | 2013-08-27 | 5  | 545608 | 3 | 269 | 5 |
| 589 | Eurasia    | 2017-08-27 | 2017-11-04 | 7  | 334445 | 3 | 147 | 6 |
| 590 | N. America | 2004-07-06 | 2004-09-13 | 7  | 167016 | 3 | 726 | 2 |
| 591 | Eurasia    | 1992-11-16 | 1993-02-03 | 8  | 227635 | 3 | 397 | 4 |
| 592 | N. America | 1988-07-30 | 1988-09-27 | 6  | 292357 | 3 | 522 | 3 |
| 593 | Eurasia    | 1992-01-11 | 1992-04-09 | 9  | 237884 | 3 | 580 | 3 |
| 594 | Eurasia    | 2018-01-04 | 2018-03-04 | 6  | 316862 | 3 | 436 | 4 |
| 595 | Australia  | 2009-01-11 | 2009-03-11 | 6  | 434603 | 3 | 393 | 4 |
| 596 | Africa     | 2007-05-12 | 2007-07-20 | 7  | 389547 | 3 | 361 | 4 |
| 597 | Eurasia    | 1988-10-08 | 1988-12-26 | 8  | 167656 | 3 | 689 | 2 |
| 598 | Eurasia    | 1994-08-28 | 1994-12-15 | 11 | 70149  | 3 | 760 | 1 |
| 599 | Africa     | 2002-06-07 | 2002-10-04 | 12 | 279804 | 3 | 574 | 3 |
| 600 | S. America | 2011-11-27 | 2012-02-14 | 8  | 346953 | 3 | 363 | 4 |
| 601 | N. America | 1987-10-14 | 1988-03-01 | 14 | 219001 | 3 | 422 | 4 |
| 602 | S. America | 1989-04-16 | 1989-07-04 | 8  | 210622 | 3 | 389 | 4 |
| 603 | N. America | 1982-08-11 | 1982-10-09 | 6  | 425678 | 3 | 635 | 2 |
| 604 | N. America | 2009-05-21 | 2009-07-09 | 5  | 328400 | 3 | 405 | 4 |
| 605 | Eurasia    | 1980-04-13 | 1980-06-01 | 5  | 482811 | 3 | 179 | 5 |
| 606 | Eurasia    | 2019-03-20 | 2019-06-07 | 8  | 245628 | 3 | 432 | 4 |
| 607 | S. America | 2011-05-11 | 2011-07-19 | 7  | 523258 | 3 | 36  | 7 |
| 608 | Eurasia    | 2001-08-01 | 2001-11-08 | 10 | 120399 | 3 | 571 | 3 |
| 609 | N. America | 1997-07-23 | 1997-10-30 | 10 | 116426 | 3 | 653 | 2 |
| 610 | N. America | 1994-01-10 | 1994-04-09 | 9  | 125999 | 3 | 748 | 1 |
| 611 | Eurasia    | 2022-10-30 | 2022-12-28 | 6  | 366309 | 3 | 230 | 5 |
| 612 | Eurasia    | 1989-05-26 | 1989-07-14 | 5  | 249026 | 3 | 632 | 2 |
| 613 | N. America | 1984-08-10 | 1984-10-18 | 7  | 329301 | 3 | 90  | 6 |
| 614 | Africa     | 1998-11-05 | 1999-01-13 | 7  | 291623 | 3 | 538 | 3 |
| 615 | Africa     | 2012-05-15 | 2012-09-21 | 13 | 215478 | 3 | 686 | 2 |
| 616 | Eurasia    | 2005-08-30 | 2005-10-08 | 4  | 224521 | 3 | 550 | 3 |
| 617 | Eurasia    | 1982-06-12 | 1982-08-30 | 8  | 254087 | 3 | 555 | 3 |
| 618 | N. America | 2014-04-15 | 2014-08-02 | 11 | 219912 | 3 | 662 | 2 |
| 619 | Eurasia    | 1983-04-08 | 1983-06-16 | 7  | 301175 | 3 | 267 | 5 |
| 620 | Eurasia    | 1980-12-09 | 1981-04-17 | 13 | 96047  | 3 | 627 | 2 |
| 621 | Africa     | 1981-04-08 | 1981-08-05 | 12 | 202849 | 2 | 703 | 2 |
| 622 | Eurasia    | 2012-07-14 | 2012-09-21 | 7  | 275191 | 2 | 536 | 3 |
| 623 | N. America | 1995-08-03 | 1995-09-21 | 5  | 321996 | 2 | 654 | 2 |

|     |            |            |            |    |        |   |     |   |
|-----|------------|------------|------------|----|--------|---|-----|---|
| 624 | N. America | 2009-05-31 | 2009-08-18 | 8  | 295674 | 2 | 704 | 2 |
| 625 | N. America | 2016-10-31 | 2017-01-28 | 9  | 81018  | 2 | 725 | 2 |
| 626 | Eurasia    | 1995-07-24 | 1995-09-11 | 5  | 266299 | 2 | 416 | 4 |
| 627 | Eurasia    | 1992-08-08 | 1992-10-16 | 7  | 185485 | 2 | 475 | 4 |
| 628 | Eurasia    | 2017-06-18 | 2017-08-26 | 7  | 139543 | 2 | 618 | 3 |
| 629 | Africa     | 2015-02-09 | 2015-03-30 | 5  | 609544 | 2 | 137 | 6 |
| 630 | N. America | 1980-01-24 | 1980-03-13 | 5  | 346550 | 2 | 511 | 3 |
| 631 | N. America | 1989-01-16 | 1989-03-16 | 6  | 360382 | 2 | 483 | 4 |
| 632 | Eurasia    | 1994-08-18 | 1994-10-16 | 6  | 239425 | 2 | 586 | 3 |
| 633 | Australia  | 2022-03-04 | 2022-06-11 | 10 | 237681 | 2 | 692 | 2 |
| 634 | Africa     | 2010-05-16 | 2010-07-14 | 6  | 458036 | 2 | 136 | 6 |
| 635 | N. America | 2011-11-27 | 2012-02-24 | 9  | 177221 | 2 | 636 | 2 |
| 636 | Africa     | 1993-12-01 | 1994-01-09 | 4  | 566083 | 2 | 299 | 4 |
| 637 | Eurasia    | 2015-11-06 | 2016-03-04 | 12 | 204249 | 2 | 640 | 2 |
| 638 | Africa     | 2013-06-29 | 2013-08-07 | 4  | 352629 | 2 | 348 | 4 |
| 639 | Australia  | 2008-03-07 | 2008-06-04 | 9  | 285226 | 2 | 623 | 2 |
| 640 | Eurasia    | 2008-10-13 | 2009-02-09 | 12 | 173850 | 2 | 771 | 1 |
| 641 | Africa     | 2002-02-07 | 2002-04-07 | 6  | 455890 | 2 | 400 | 4 |
| 642 | Eurasia    | 2018-05-24 | 2018-07-12 | 5  | 320727 | 2 | 485 | 4 |
| 643 | Eurasia    | 2001-09-20 | 2001-12-18 | 9  | 151971 | 2 | 663 | 2 |
| 644 | N. America | 2013-11-16 | 2014-02-23 | 10 | 133764 | 2 | 755 | 1 |
| 645 | Eurasia    | 2014-05-15 | 2014-09-11 | 12 | 146372 | 2 | 762 | 1 |
| 646 | N. America | 2022-01-03 | 2022-04-02 | 9  | 96242  | 2 | 714 | 2 |
| 647 | N. America | 2015-06-09 | 2015-08-17 | 7  | 239090 | 2 | 631 | 2 |
| 648 | Eurasia    | 2015-05-20 | 2015-07-28 | 7  | 265978 | 2 | 294 | 4 |
| 649 | Eurasia    | 1990-09-28 | 1990-12-06 | 7  | 258597 | 2 | 533 | 3 |
| 650 | Eurasia    | 1992-06-29 | 1992-09-06 | 7  | 252265 | 2 | 648 | 2 |
| 651 | Africa     | 2008-09-13 | 2008-10-22 | 4  | 525910 | 2 | 193 | 5 |
| 652 | N. America | 2005-02-01 | 2005-04-11 | 7  | 229538 | 2 | 443 | 4 |
| 653 | Australia  | 1987-07-16 | 1987-11-02 | 11 | 231169 | 2 | 547 | 3 |
| 654 | N. America | 2003-02-22 | 2003-06-21 | 12 | 154607 | 2 | 470 | 4 |
| 655 | Eurasia    | 2018-08-02 | 2018-09-30 | 6  | 127474 | 2 | 727 | 2 |
| 656 | N. America | 2016-12-10 | 2017-03-19 | 10 | 85304  | 2 | 710 | 2 |
| 657 | Australia  | 2002-03-09 | 2002-05-27 | 8  | 262404 | 2 | 664 | 2 |
| 658 | S. America | 2004-11-03 | 2004-12-22 | 5  | 467523 | 2 | 527 | 3 |
| 659 | N. America | 1981-04-08 | 1981-06-26 | 8  | 211014 | 2 | 507 | 3 |
| 660 | Eurasia    | 1994-12-26 | 1995-03-25 | 9  | 69176  | 2 | 768 | 1 |
| 661 | Africa     | 2002-07-07 | 2002-09-24 | 8  | 301987 | 2 | 270 | 5 |
| 662 | Africa     | 1997-11-20 | 1998-04-08 | 14 | 189851 | 2 | 685 | 2 |
| 663 | Africa     | 1990-03-12 | 1990-04-20 | 4  | 725321 | 2 | 111 | 6 |
| 664 | Eurasia    | 1995-09-02 | 1995-10-21 | 5  | 343960 | 2 | 75  | 6 |
| 665 | S. America | 2012-10-22 | 2012-12-10 | 5  | 448303 | 2 | 311 | 4 |
| 666 | S. America | 2019-08-07 | 2019-10-05 | 6  | 481329 | 2 | 265 | 5 |
| 667 | Eurasia    | 2008-04-26 | 2008-06-14 | 5  | 480716 | 2 | 221 | 5 |
| 668 | Eurasia    | 2003-07-02 | 2003-09-19 | 8  | 125359 | 2 | 589 | 3 |

|     |            |            |            |    |        |   |     |   |
|-----|------------|------------|------------|----|--------|---|-----|---|
| 669 | N. America | 2008-03-07 | 2008-05-25 | 8  | 195973 | 2 | 548 | 3 |
| 670 | Eurasia    | 1979-12-25 | 1980-03-03 | 7  | 192398 | 2 | 758 | 1 |
| 671 | S. America | 2018-04-14 | 2018-07-22 | 10 | 267083 | 2 | 576 | 3 |
| 672 | S. America | 2003-11-19 | 2004-01-07 | 5  | 600999 | 2 | 271 | 5 |
| 673 | Eurasia    | 2005-01-12 | 2005-04-11 | 9  | 98799  | 2 | 767 | 1 |
| 674 | S. America | 2019-02-18 | 2019-04-18 | 6  | 438800 | 2 | 255 | 5 |
| 675 | S. America | 2017-06-28 | 2017-08-16 | 5  | 420736 | 2 | 707 | 2 |
| 676 | Eurasia    | 2020-04-03 | 2020-06-11 | 7  | 249025 | 2 | 637 | 2 |
| 677 | Africa     | 2016-12-20 | 2017-01-28 | 4  | 558974 | 2 | 322 | 4 |
| 678 | Eurasia    | 1994-01-10 | 1994-04-09 | 9  | 109732 | 2 | 709 | 2 |
| 679 | S. America | 2011-10-18 | 2011-12-06 | 5  | 527073 | 2 | 49  | 6 |
| 680 | Africa     | 1992-11-26 | 1993-01-24 | 6  | 391536 | 2 | 53  | 6 |
| 681 | Africa     | 1984-01-23 | 1984-03-22 | 6  | 313452 | 2 | 772 | 1 |
| 682 | N. America | 2014-05-05 | 2014-07-03 | 6  | 261226 | 2 | 414 | 4 |
| 683 | Eurasia    | 2010-11-22 | 2011-01-30 | 7  | 238573 | 2 | 521 | 3 |
| 684 | S. America | 1989-01-26 | 1989-04-05 | 7  | 227839 | 2 | 564 | 3 |
| 685 | Eurasia    | 1992-04-20 | 1992-06-18 | 6  | 388806 | 2 | 191 | 5 |
| 686 | Eurasia    | 2005-01-12 | 2005-04-01 | 8  | 225820 | 2 | 453 | 4 |
| 687 | Eurasia    | 2001-12-09 | 2002-02-06 | 6  | 263705 | 2 | 549 | 3 |
| 688 | Eurasia    | 1991-07-15 | 1991-10-02 | 8  | 326053 | 2 | 350 | 4 |
| 689 | Africa     | 1998-03-20 | 1998-05-08 | 5  | 465471 | 2 | 402 | 4 |
| 690 | Eurasia    | 2020-11-29 | 2021-03-08 | 10 | 67642  | 2 | 751 | 1 |
| 691 | Eurasia    | 2006-04-17 | 2006-06-15 | 6  | 177917 | 2 | 616 | 3 |
| 692 | N. America | 1984-07-01 | 1984-09-08 | 7  | 209309 | 2 | 502 | 4 |
| 693 | N. America | 2020-09-10 | 2020-11-18 | 7  | 98458  | 2 | 763 | 1 |
| 694 | N. America | 2000-09-05 | 2000-11-13 | 7  | 149293 | 2 | 561 | 3 |
| 695 | N. America | 2007-11-18 | 2008-01-26 | 7  | 299805 | 2 | 331 | 4 |
| 696 | Eurasia    | 1997-12-20 | 1998-03-29 | 10 | 81619  | 2 | 735 | 2 |
| 697 | S. America | 1999-12-20 | 2000-02-07 | 5  | 424170 | 2 | 334 | 4 |
| 698 | S. America | 1992-11-26 | 1993-01-14 | 5  | 439605 | 2 | 88  | 6 |
| 699 | S. America | 2011-10-18 | 2012-01-05 | 8  | 245363 | 2 | 612 | 3 |
| 700 | Eurasia    | 1983-10-25 | 1984-02-01 | 10 | 85075  | 2 | 722 | 2 |
| 701 | Eurasia    | 1988-09-28 | 1988-12-06 | 7  | 147138 | 2 | 743 | 1 |
| 702 | Eurasia    | 2002-06-27 | 2002-10-14 | 11 | 197279 | 2 | 4   | 7 |
| 703 | N. America | 1984-06-11 | 1984-08-19 | 7  | 191526 | 2 | 345 | 4 |
| 704 | Eurasia    | 1990-07-30 | 1990-09-27 | 6  | 182316 | 2 | 170 | 5 |
| 705 | Eurasia    | 2001-08-31 | 2001-10-19 | 5  | 437514 | 2 | 225 | 5 |
| 706 | Africa     | 2020-04-23 | 2020-07-01 | 7  | 341613 | 2 | 512 | 3 |
| 707 | N. America | 2017-04-09 | 2017-07-17 | 10 | 112134 | 2 | 712 | 2 |
| 708 | Eurasia    | 1993-06-14 | 1993-09-01 | 8  | 195687 | 2 | 642 | 2 |
| 709 | N. America | 2014-10-02 | 2014-11-30 | 6  | 198501 | 2 | 601 | 3 |
| 710 | Eurasia    | 2020-11-29 | 2021-02-06 | 7  | 136015 | 2 | 594 | 3 |
| 711 | Australia  | 1983-01-18 | 1983-03-08 | 5  | 377592 | 2 | 680 | 2 |
| 712 | Australia  | 1983-01-08 | 1983-03-18 | 7  | 232645 | 2 | 556 | 3 |
| 713 | Eurasia    | 2001-01-13 | 2001-04-02 | 8  | 123327 | 2 | 754 | 1 |



|     |            |            |            |    |        |   |     |   |
|-----|------------|------------|------------|----|--------|---|-----|---|
| 714 | Eurasia    | 2006-10-04 | 2006-12-02 | 6  | 307582 | 2 | 450 | 4 |
| 715 | Africa     | 2011-06-10 | 2011-08-18 | 7  | 297629 | 2 | 256 | 5 |
| 716 | Eurasia    | 2010-09-23 | 2010-12-11 | 8  | 164021 | 2 | 745 | 1 |
| 717 | Eurasia    | 2013-03-01 | 2013-04-29 | 6  | 303727 | 2 | 505 | 3 |
| 718 | Africa     | 2014-06-14 | 2014-08-12 | 6  | 476942 | 2 | 39  | 7 |
| 719 | Eurasia    | 1991-09-03 | 1991-11-11 | 7  | 221001 | 2 | 531 | 3 |
| 720 | N. America | 1998-06-08 | 1998-07-27 | 5  | 206603 | 2 | 697 | 2 |
| 721 | Africa     | 2002-01-18 | 2002-03-08 | 5  | 429891 | 2 | 488 | 4 |
| 722 | Australia  | 1983-01-18 | 1983-03-08 | 5  | 422938 | 2 | 155 | 6 |
| 723 | S. America | 1990-11-17 | 1991-01-05 | 5  | 414324 | 2 | 290 | 4 |
| 724 | Eurasia    | 1994-10-27 | 1995-01-04 | 7  | 160187 | 2 | 728 | 2 |
| 725 | Eurasia    | 1991-09-23 | 1991-12-21 | 9  | 201526 | 2 | 773 | 1 |
| 726 | N. America | 1989-12-22 | 1990-04-10 | 11 | 68935  | 2 | 730 | 2 |
| 727 | Eurasia    | 2001-04-03 | 2001-07-11 | 10 | 154845 | 2 | 774 | 1 |
| 728 | Eurasia    | 2016-03-15 | 2016-06-02 | 8  | 214444 | 2 | 674 | 2 |
| 729 | N. America | 2012-09-12 | 2012-11-20 | 7  | 200201 | 2 | 493 | 4 |
| 730 | S. America | 2018-12-20 | 2019-02-27 | 7  | 298329 | 2 | 660 | 2 |
| 731 | Australia  | 2007-08-30 | 2007-11-07 | 7  | 278510 | 2 | 419 | 4 |
| 732 | S. America | 1989-03-27 | 1989-06-04 | 7  | 210199 | 2 | 463 | 4 |
| 733 | Eurasia    | 2006-07-26 | 2006-09-23 | 6  | 166180 | 2 | 474 | 4 |
| 734 | S. America | 2005-02-11 | 2005-04-01 | 5  | 435372 | 2 | 94  | 6 |
| 735 | N. America | 2017-08-07 | 2017-10-15 | 7  | 194615 | 2 | 599 | 3 |
| 736 | N. America | 2017-08-27 | 2017-11-04 | 7  | 147471 | 2 | 676 | 2 |
| 737 | Australia  | 1989-07-25 | 1989-10-22 | 9  | 204233 | 1 | 765 | 1 |
| 738 | N. America | 2008-09-23 | 2008-12-21 | 9  | 147922 | 1 | 615 | 3 |
| 739 | Eurasia    | 2001-05-13 | 2001-07-11 | 6  | 243813 | 1 | 775 | 1 |
| 740 | Eurasia    | 1990-10-08 | 1990-12-16 | 7  | 109136 | 1 | 747 | 1 |
| 741 | Eurasia    | 1993-08-13 | 1993-11-10 | 9  | 274874 | 1 | 403 | 4 |
| 742 | N. America | 1997-04-04 | 1997-06-22 | 8  | 115139 | 1 | 607 | 3 |
| 743 | N. America | 1998-04-09 | 1998-05-28 | 5  | 240436 | 1 | 651 | 2 |
| 744 | Africa     | 2000-02-18 | 2000-05-07 | 8  | 198361 | 1 | 560 | 3 |
| 745 | Eurasia    | 2011-05-01 | 2011-06-29 | 6  | 193502 | 1 | 667 | 2 |
| 746 | S. America | 1982-11-19 | 1982-12-28 | 4  | 479720 | 1 | 335 | 4 |
| 747 | Eurasia    | 1986-10-09 | 1986-12-27 | 8  | 179782 | 1 | 424 | 4 |
| 748 | S. America | 2011-08-09 | 2011-10-07 | 6  | 271219 | 1 | 583 | 3 |
| 749 | Eurasia    | 2007-02-01 | 2007-05-11 | 10 | 157344 | 1 | 624 | 2 |
| 750 | Eurasia    | 1993-02-14 | 1993-04-04 | 5  | 288244 | 1 | 375 | 4 |
| 751 | N. America | 1988-10-28 | 1989-01-05 | 7  | 144548 | 1 | 602 | 3 |
| 752 | Eurasia    | 2014-01-25 | 2014-04-14 | 8  | 80250  | 1 | 732 | 2 |
| 753 | N. America | 2013-04-20 | 2013-06-28 | 7  | 225596 | 1 | 619 | 3 |
| 754 | Africa     | 2004-11-13 | 2005-02-20 | 10 | 181373 | 1 | 665 | 2 |
| 755 | Africa     | 2018-11-10 | 2018-12-29 | 5  | 336119 | 1 | 31  | 7 |
| 756 | Eurasia    | 2007-10-09 | 2007-12-07 | 6  | 244747 | 1 | 609 | 3 |
| 757 | Africa     | 1990-11-07 | 1991-01-05 | 6  | 344458 | 1 | 229 | 5 |
| 758 | N. America | 1988-10-08 | 1988-12-26 | 8  | 192035 | 1 | 666 | 2 |

|     |            |            |            |   |        |   |     |   |
|-----|------------|------------|------------|---|--------|---|-----|---|
| 759 | Africa     | 1982-07-12 | 1982-10-09 | 9 | 164656 | 1 | 757 | 1 |
| 760 | N. America | 1987-10-24 | 1988-01-01 | 7 | 247945 | 1 | 614 | 3 |
| 761 | N. America | 1999-01-04 | 1999-03-24 | 8 | 194250 | 1 | 695 | 2 |
| 762 | Africa     | 2004-05-17 | 2004-07-25 | 7 | 285870 | 1 | 376 | 4 |
| 763 | Eurasia    | 2019-09-16 | 2019-11-14 | 6 | 190868 | 1 | 598 | 3 |
| 764 | S. America | 2015-06-09 | 2015-08-07 | 6 | 274450 | 1 | 352 | 4 |
| 765 | N. America | 2012-11-21 | 2013-01-29 | 7 | 111902 | 1 | 750 | 1 |
| 766 | Eurasia    | 1996-01-10 | 1996-03-29 | 8 | 144017 | 1 | 699 | 2 |
| 767 | Africa     | 2013-05-20 | 2013-06-28 | 4 | 295126 | 1 | 731 | 2 |
| 768 | Australia  | 2000-12-24 | 2001-03-03 | 7 | 230913 | 1 | 613 | 3 |
| 769 | Eurasia    | 1987-01-07 | 1987-04-06 | 9 | 160901 | 1 | 723 | 2 |
| 770 | N. America | 2007-05-02 | 2007-06-30 | 6 | 139863 | 1 | 700 | 2 |
| 771 | Australia  | 2008-06-25 | 2008-08-23 | 6 | 278318 | 1 | 604 | 3 |
| 772 | Eurasia    | 2006-09-04 | 2006-11-12 | 7 | 145813 | 1 | 759 | 1 |
| 773 | Africa     | 2013-06-09 | 2013-06-28 | 2 | 255948 | 1 | 626 | 2 |
| 774 | Eurasia    | 2002-05-18 | 2002-06-26 | 4 | 121371 | 1 | 590 | 3 |
| 775 | Africa     | 2013-05-30 | 2013-06-28 | 3 | 165552 | 1 | 702 | 2 |
