# Supplementary material for: Global catalog of soil moisture droughts over the past four decades
Source: Copernicus journal article supplement (doi:10.5194/hess-29-3341-2025), 2025-07-30
Supplement: Supplementary file 3 [file hess-29-3341-2025-supplement.zip]

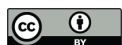

## *Supplement of*

# **Global catalog of soil moisture droughts over the past four decades**

**Jan Řehoř et al.**

*Correspondence to:* Jan Řehoř (rehor@sci.muni.cz)

- hess-29-3341-2025-supplement-title-page.pdf
- Supplement\_revised\_v2
  - Animation\_S1.mp4
  - Figure\_S1.png
  - Figure\_S2.png
  - Figure\_captions.docx
  - Table\_S1.pdf
  - Table\_S2.pdf

The copyright of individual parts of the supplement might differ from the article licence.
